# Supplementary material for: Synthesis, structure, and photophysics of copper(i) triphenylphosphine complexes with functionalized 3-(2′-pyrimidinyl)-1,2,4-triazole ligands
Source: Royal Society of Chemistry journal article supplement (doi:10.1039/c7dt02848b), 2017-01-01
Supplement: c7dt02848b1.pdf [file c7dt02848b1.pdf]

## *Electronic Supplementary Information (ESI)*

### **Synthesis, structure, and photophysical properties of copper(I) triphenylphosphine complexes with functionalized 3-(2'-pyrimidinyl)-1,2,4-triazole ligands**

Jing-Lin Chen,<sup>\*abc</sup> Xue-Hua Zeng,<sup>a</sup> Yan-Sheng Luo,<sup>a</sup> Wan-Man Wang,<sup>a</sup> Li-Hua He,<sup>a</sup> Sui-Jun Liu,<sup>a</sup> He-Rui Wen,<sup>a</sup> Shuping Huang,<sup>\*c</sup> Li Liu<sup>\*d</sup> and Wai-Yeung Wong<sup>\*b</sup>

<sup>a</sup> *School of Metallurgy and Chemical Engineering, Jiangxi University of Science and Technology, Ganzhou 341000, P.R. China*

<sup>b</sup> *Department of Applied Biology and Chemical Technology, The Hong Kong Polytechnic University, Hung Hom, Hong Kong, P.R. China*

<sup>c</sup> *College of Chemistry, Fuzhou University, Fuzhou 350116, P.R. China*

<sup>d</sup> *Hubei Collaborative Innovation Center for Advanced Organic Chemical Materials, Ministry of Education Key Laboratory for the Synthesis and Application of Organic Functional Molecules, School of Chemistry and Chemical Engineering, Hubei University, Wuhan 430062, P.R. China.*

<sup>e</sup> *Beijing Synchrotron Radiation Facility, Institute of High Energy Physics, Chinese Academy of Sciences, Beijing 100049, P.R. China.*

---

\*Authors to whom correspondence should be addressed.

E-mail: gzchenjinglin@126.com (J.-L. Chen); wai-yeung.wong@polyu.edu.hk (W.-Y. Wong); huangshp@gmail.com (S. Huang); liulihubei@hubu.edu.cn (L. Liu)

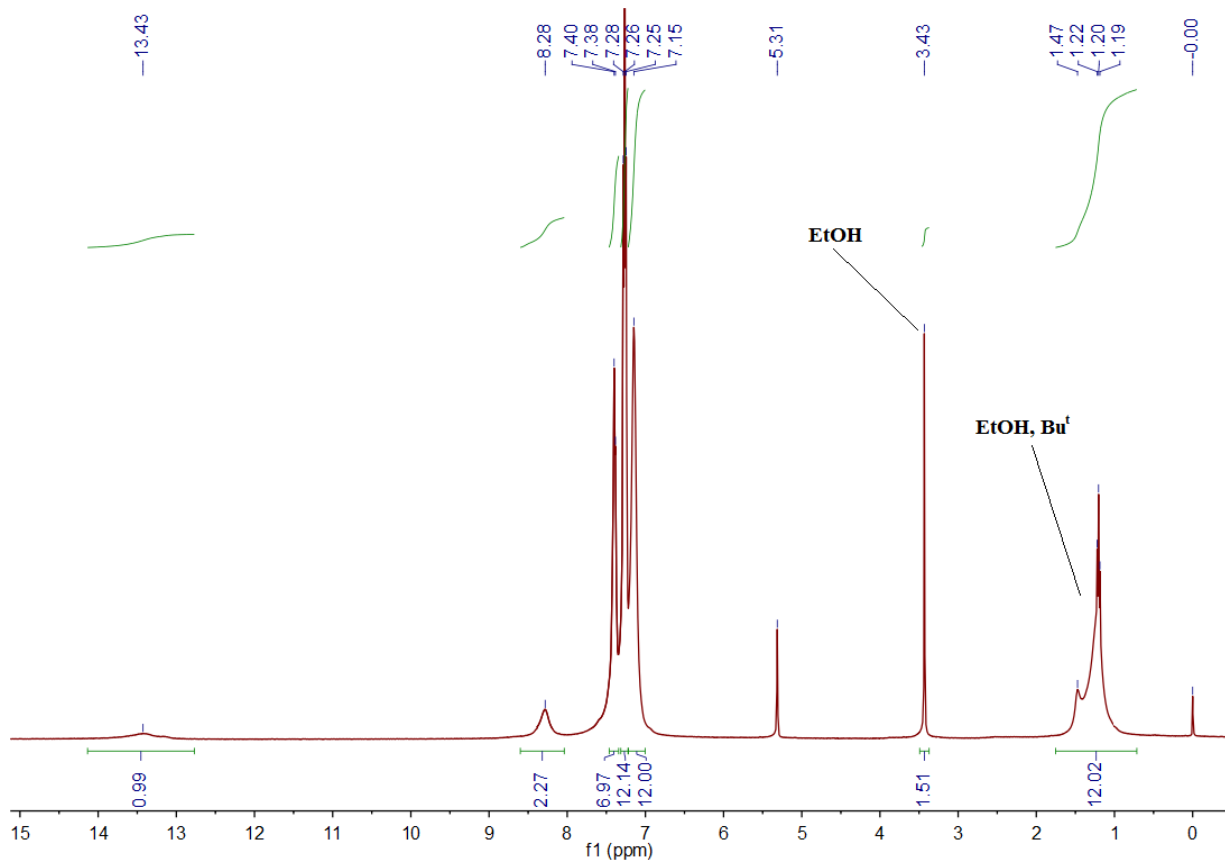

Fig. S1 <sup>1</sup>H NMR spectrum of **1** in CD<sub>2</sub>Cl<sub>2</sub>.

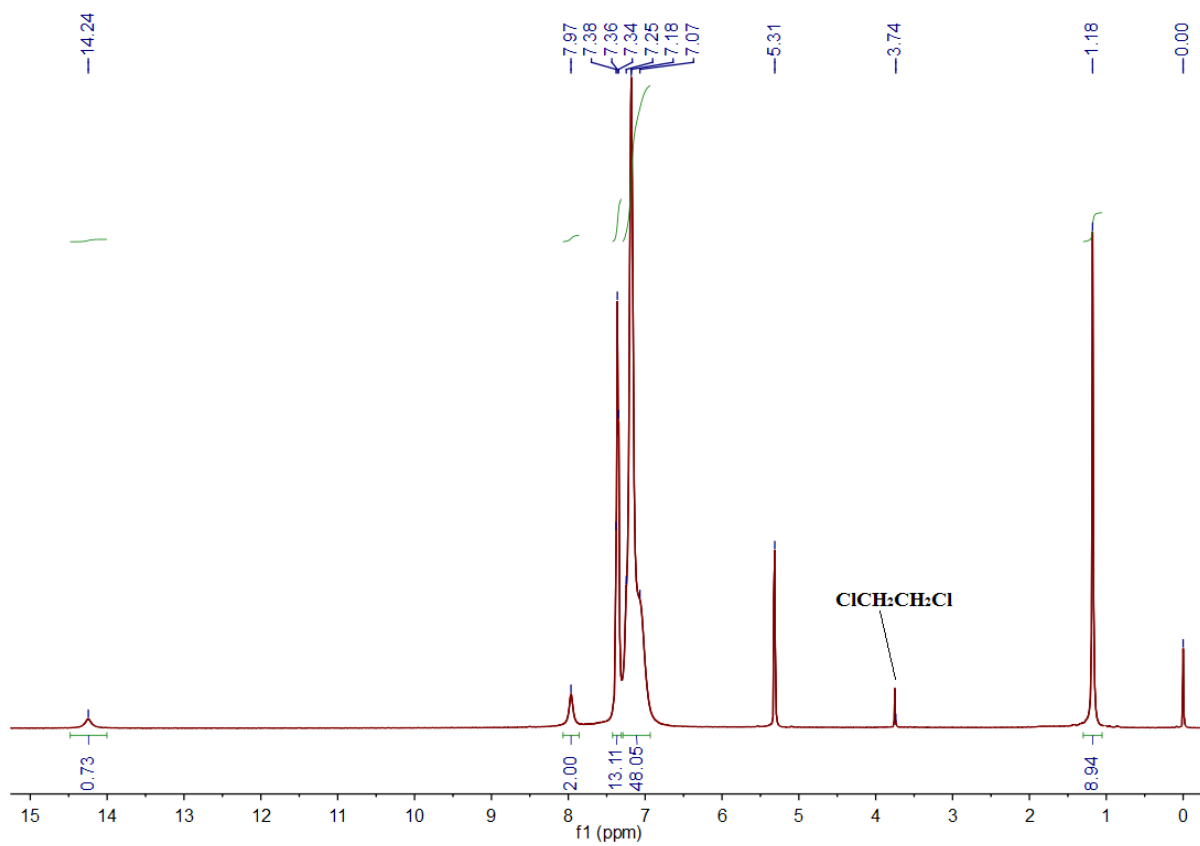

Fig. S2 <sup>1</sup>H NMR spectrum of **2** in CD<sub>2</sub>Cl<sub>2</sub>.

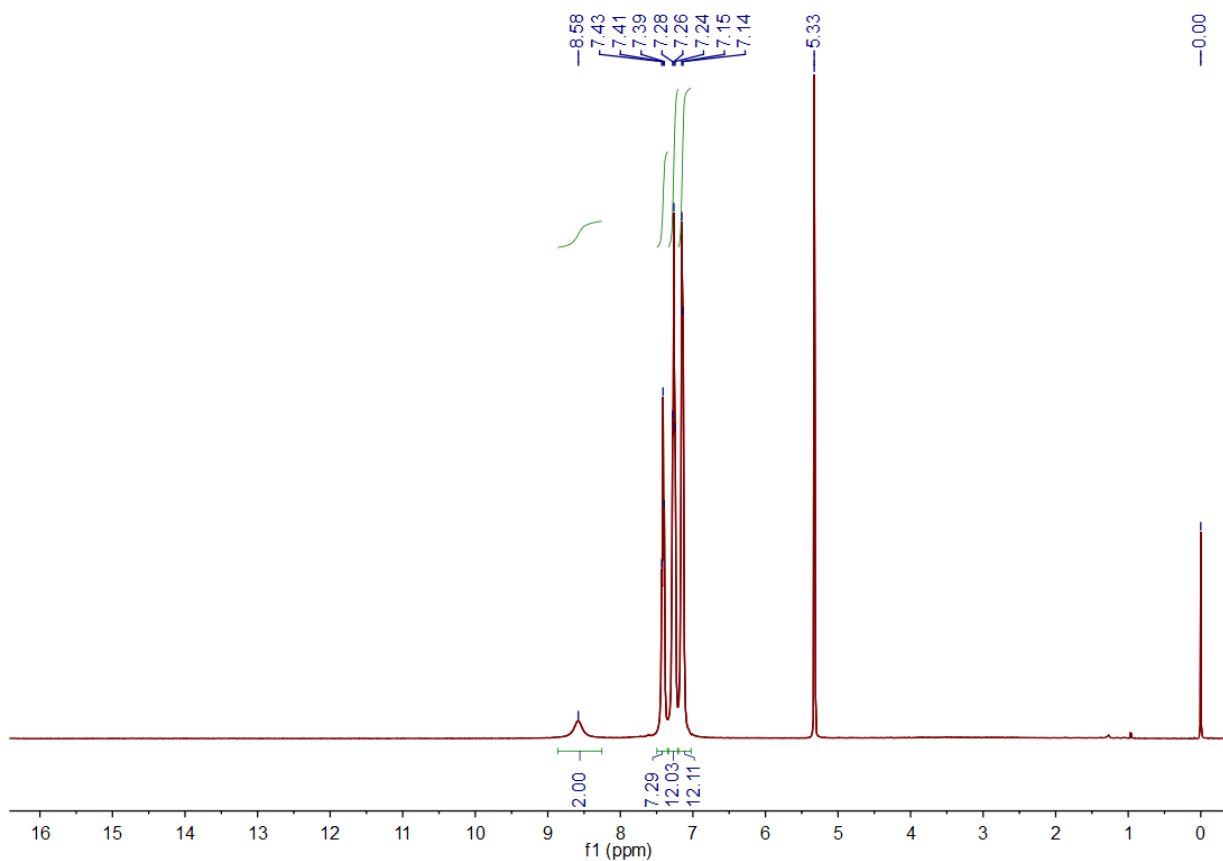

**Fig. S3**  $^1\text{H}$  NMR spectrum of **3** in  $\text{CD}_2\text{Cl}_2$ .

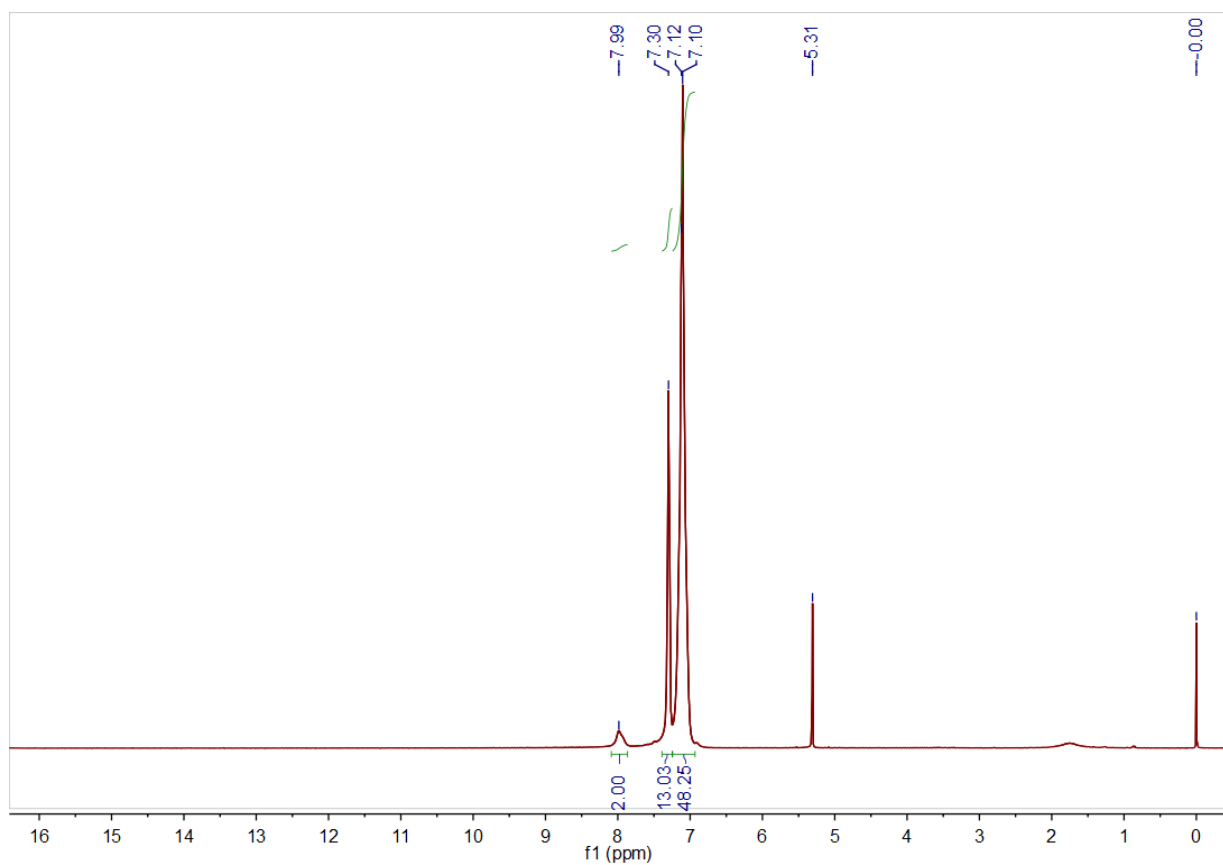

**Fig. S4**  $^1\text{H}$  NMR spectrum of **4** in  $\text{CD}_2\text{Cl}_2$ .

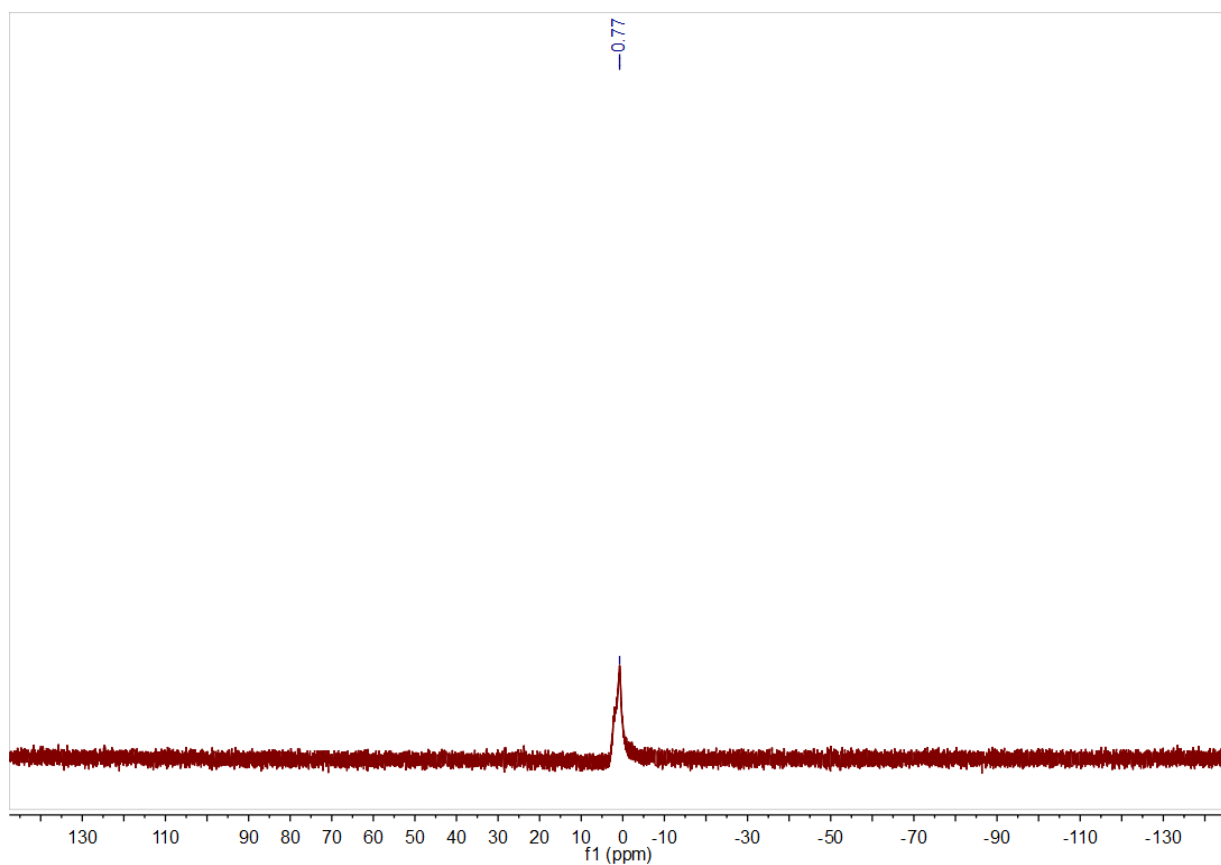

**Fig. S5**  $^{31}\text{P}$  NMR spectrum of **1** in  $\text{CD}_2\text{Cl}_2$ .

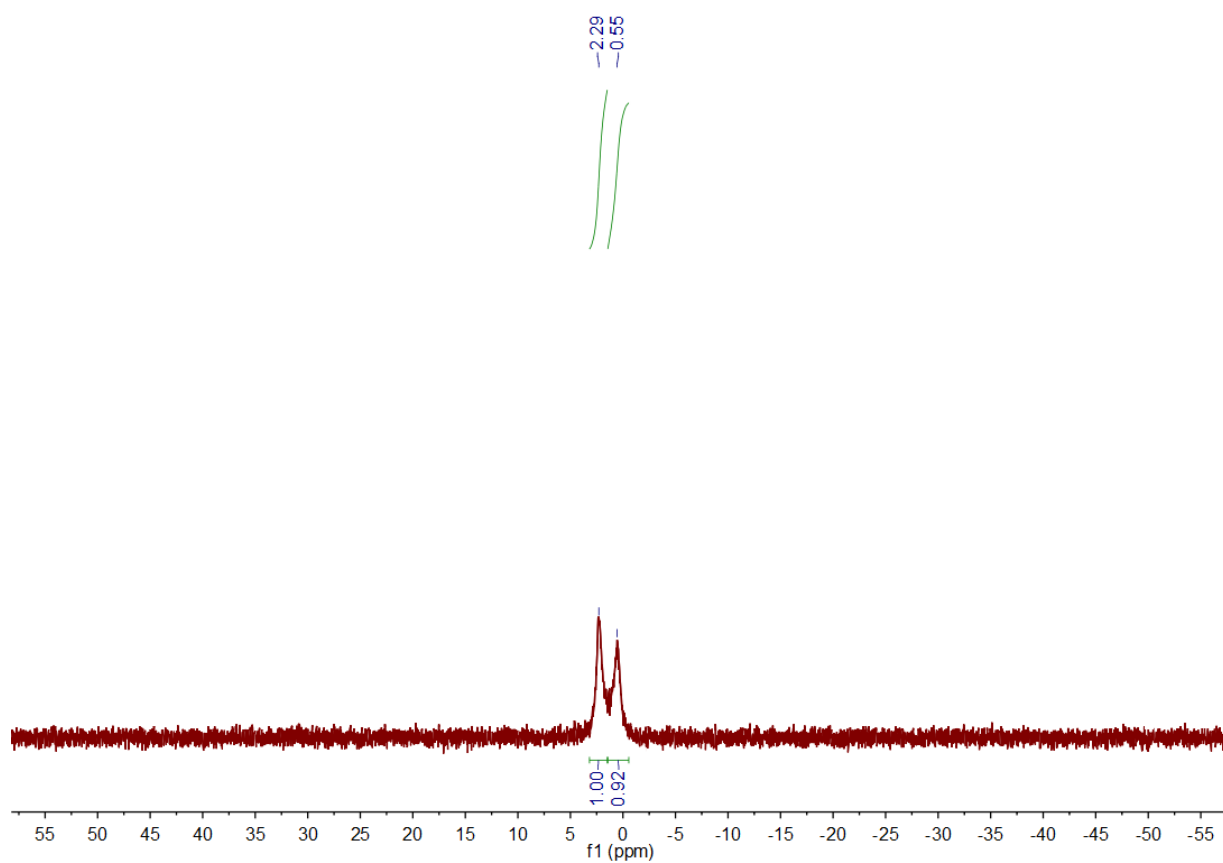

**Fig. S6**  $^{31}\text{P}$  NMR spectrum of **2** in  $\text{CD}_2\text{Cl}_2$ .

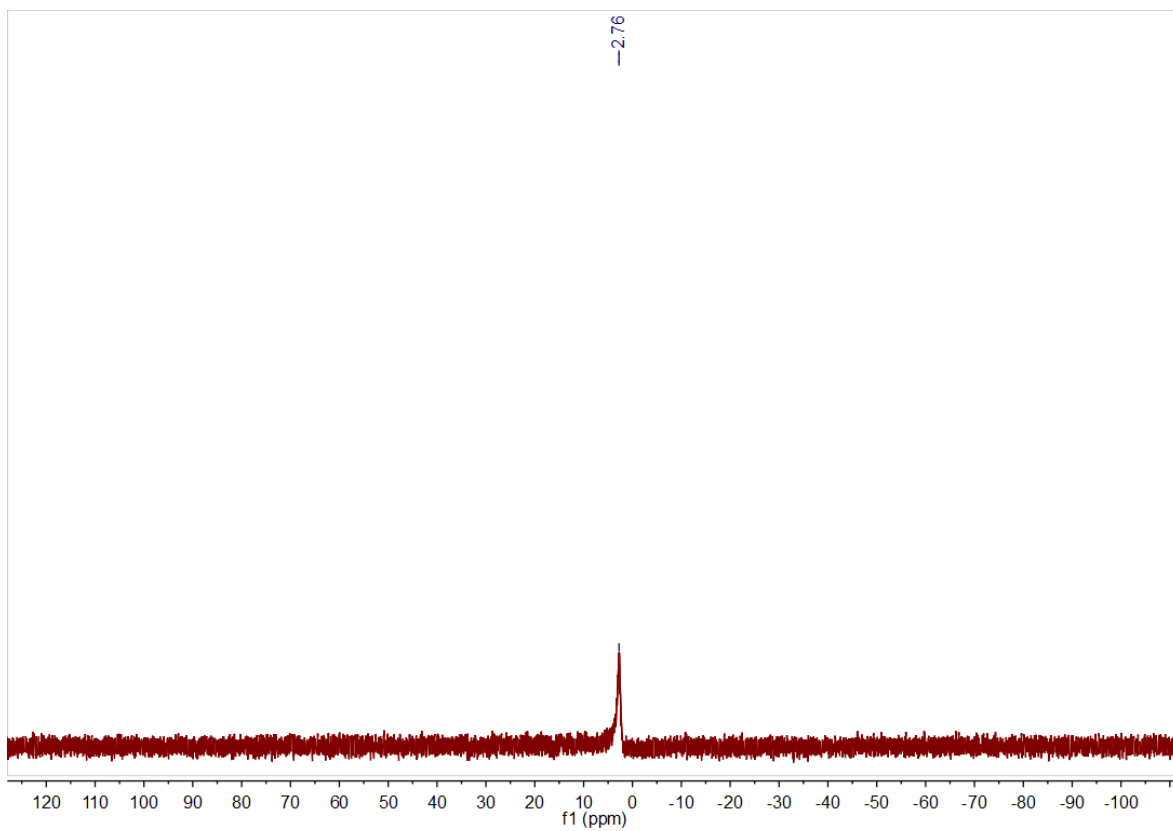

**Fig. S7**  $^{31}\text{P}$  NMR spectrum of **3** in  $\text{CD}_2\text{Cl}_2$ .

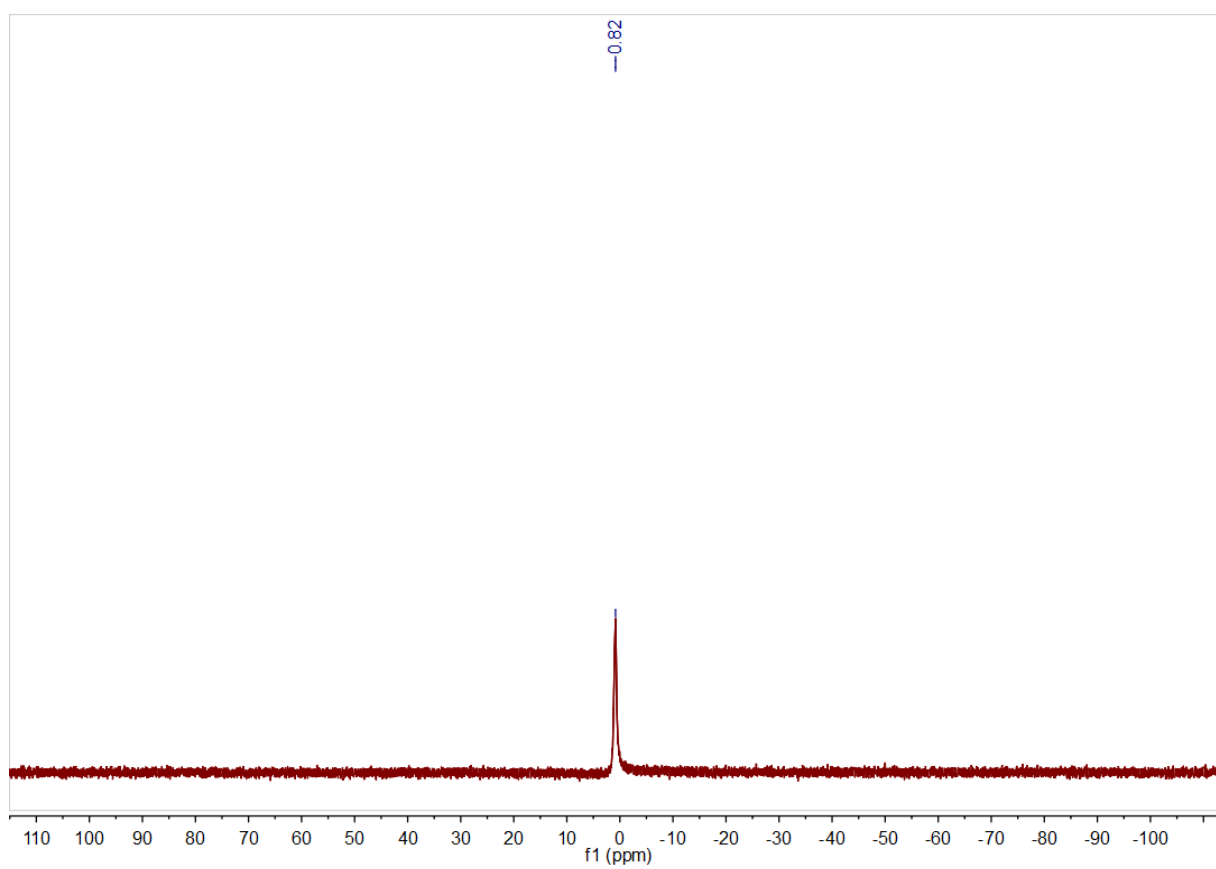

**Fig. S8**  $^{31}\text{P}$  NMR spectrum of **4** in  $\text{CD}_2\text{Cl}_2$ .

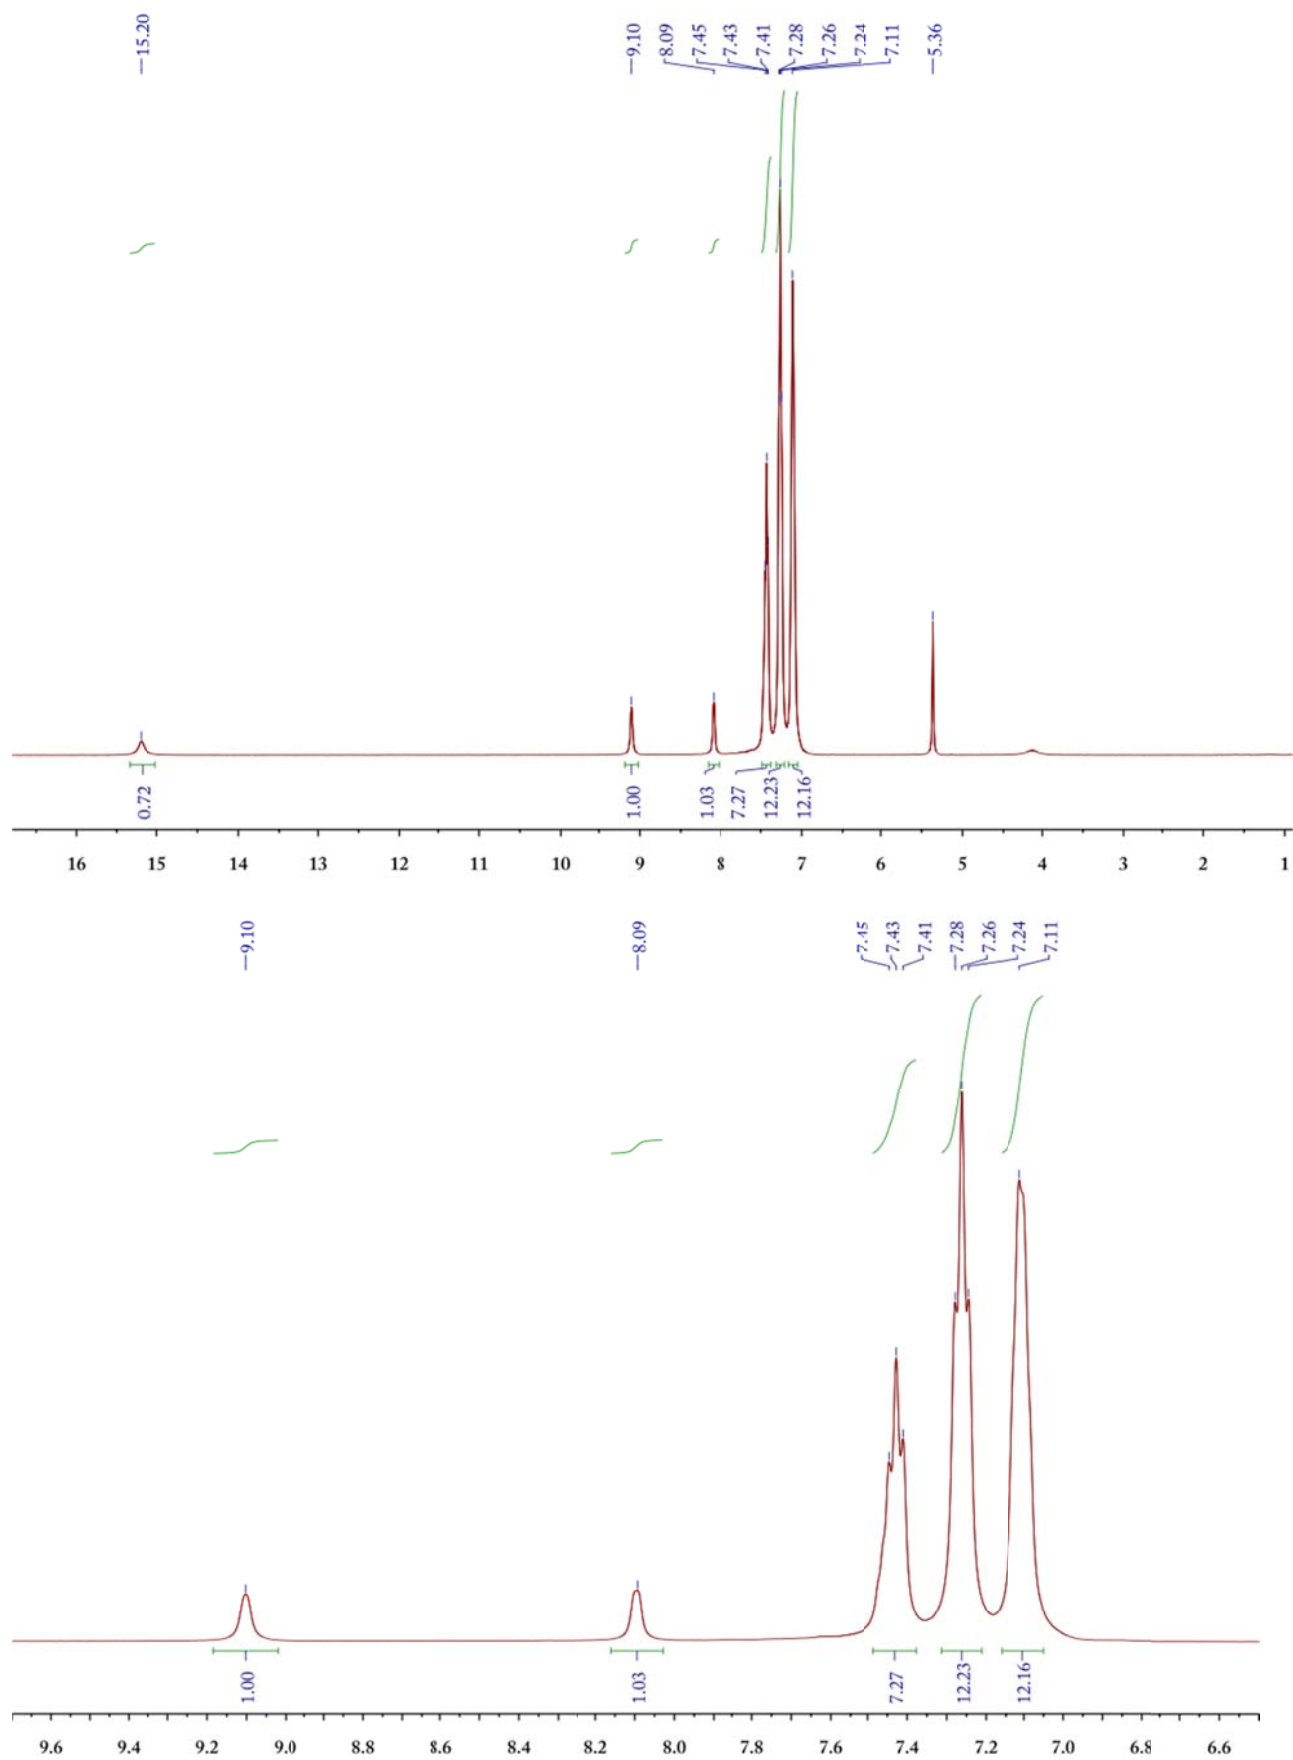

**Fig. S9**  $^1\text{H}$  NMR spectra of **3** in  $\text{CD}_2\text{Cl}_2$  at 218 K.

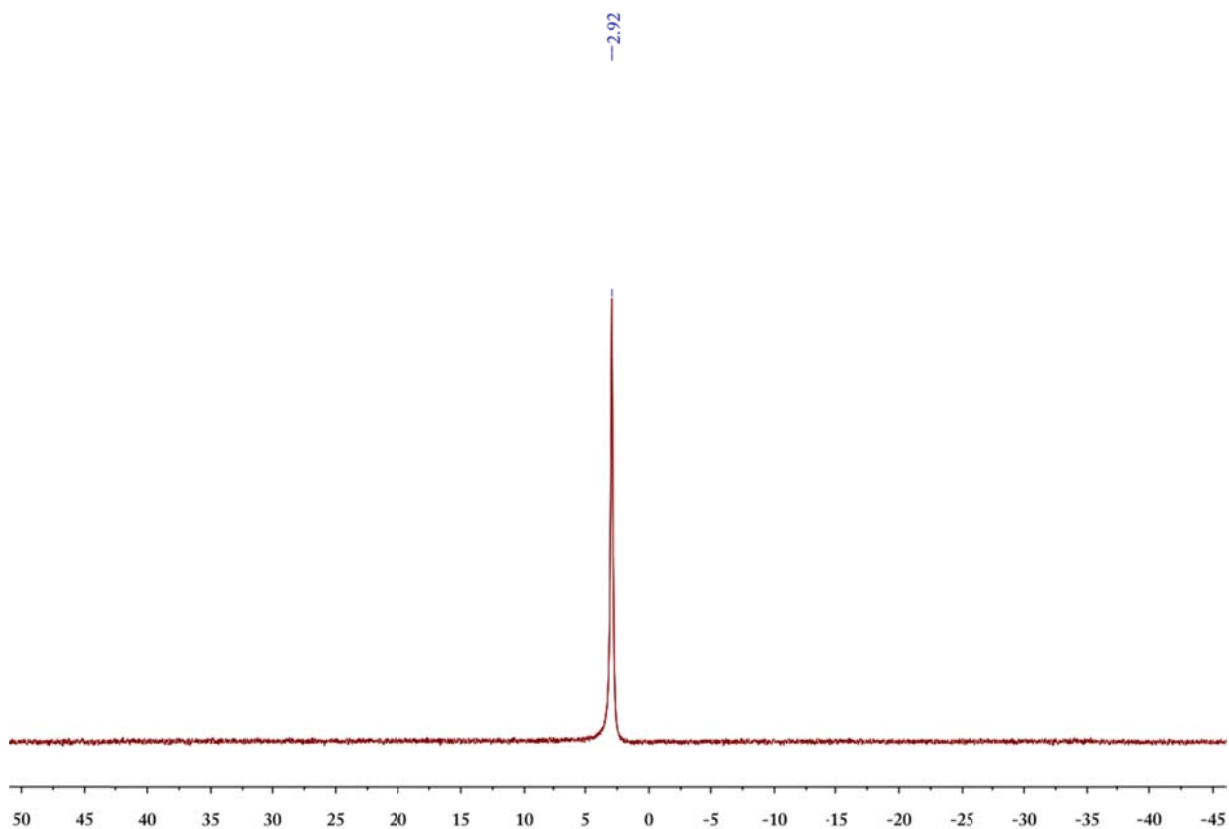

**Fig. S10** <sup>31</sup>P NMR spectrum of **3** in CD<sub>2</sub>Cl<sub>2</sub> at 218 K.

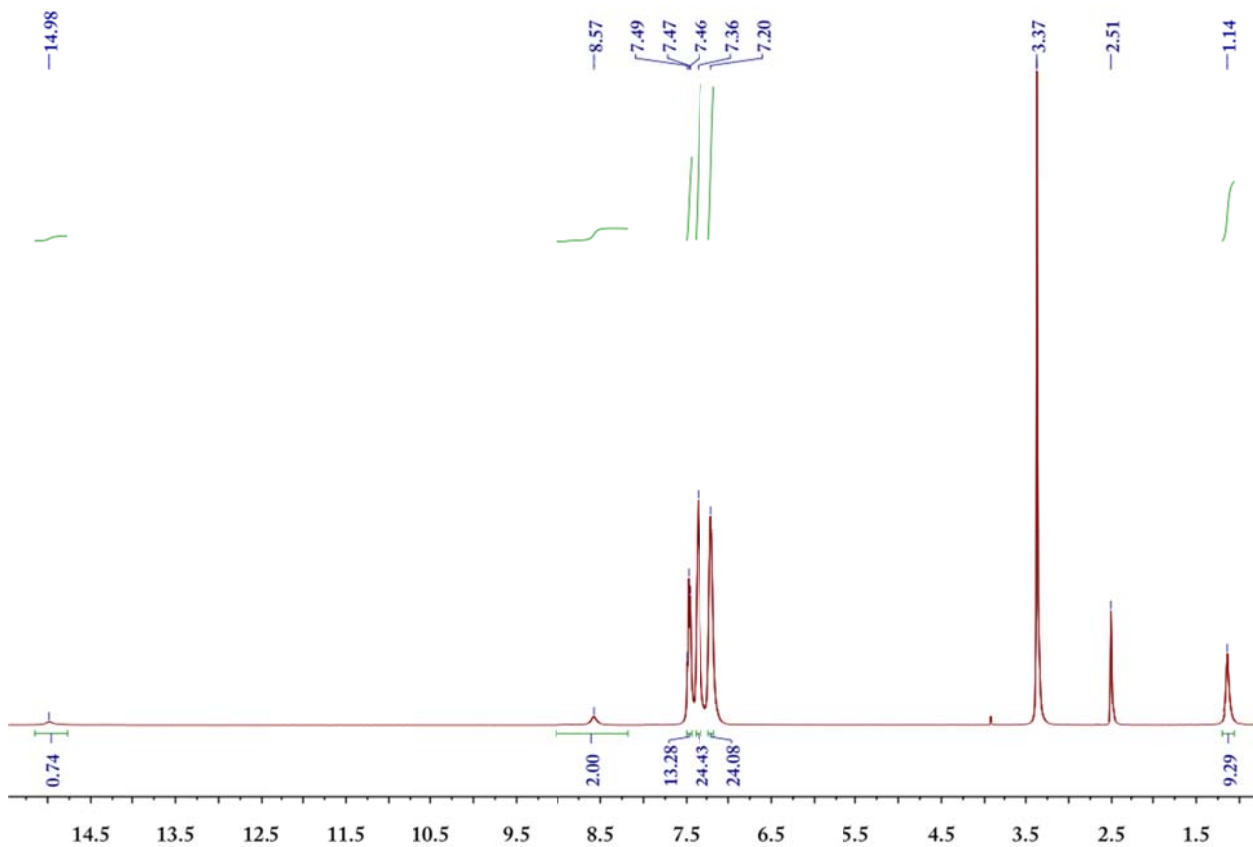

**Fig. S11** <sup>1</sup>H NMR spectrum of **2** in DMSO-*d*<sub>6</sub> at 298 K.

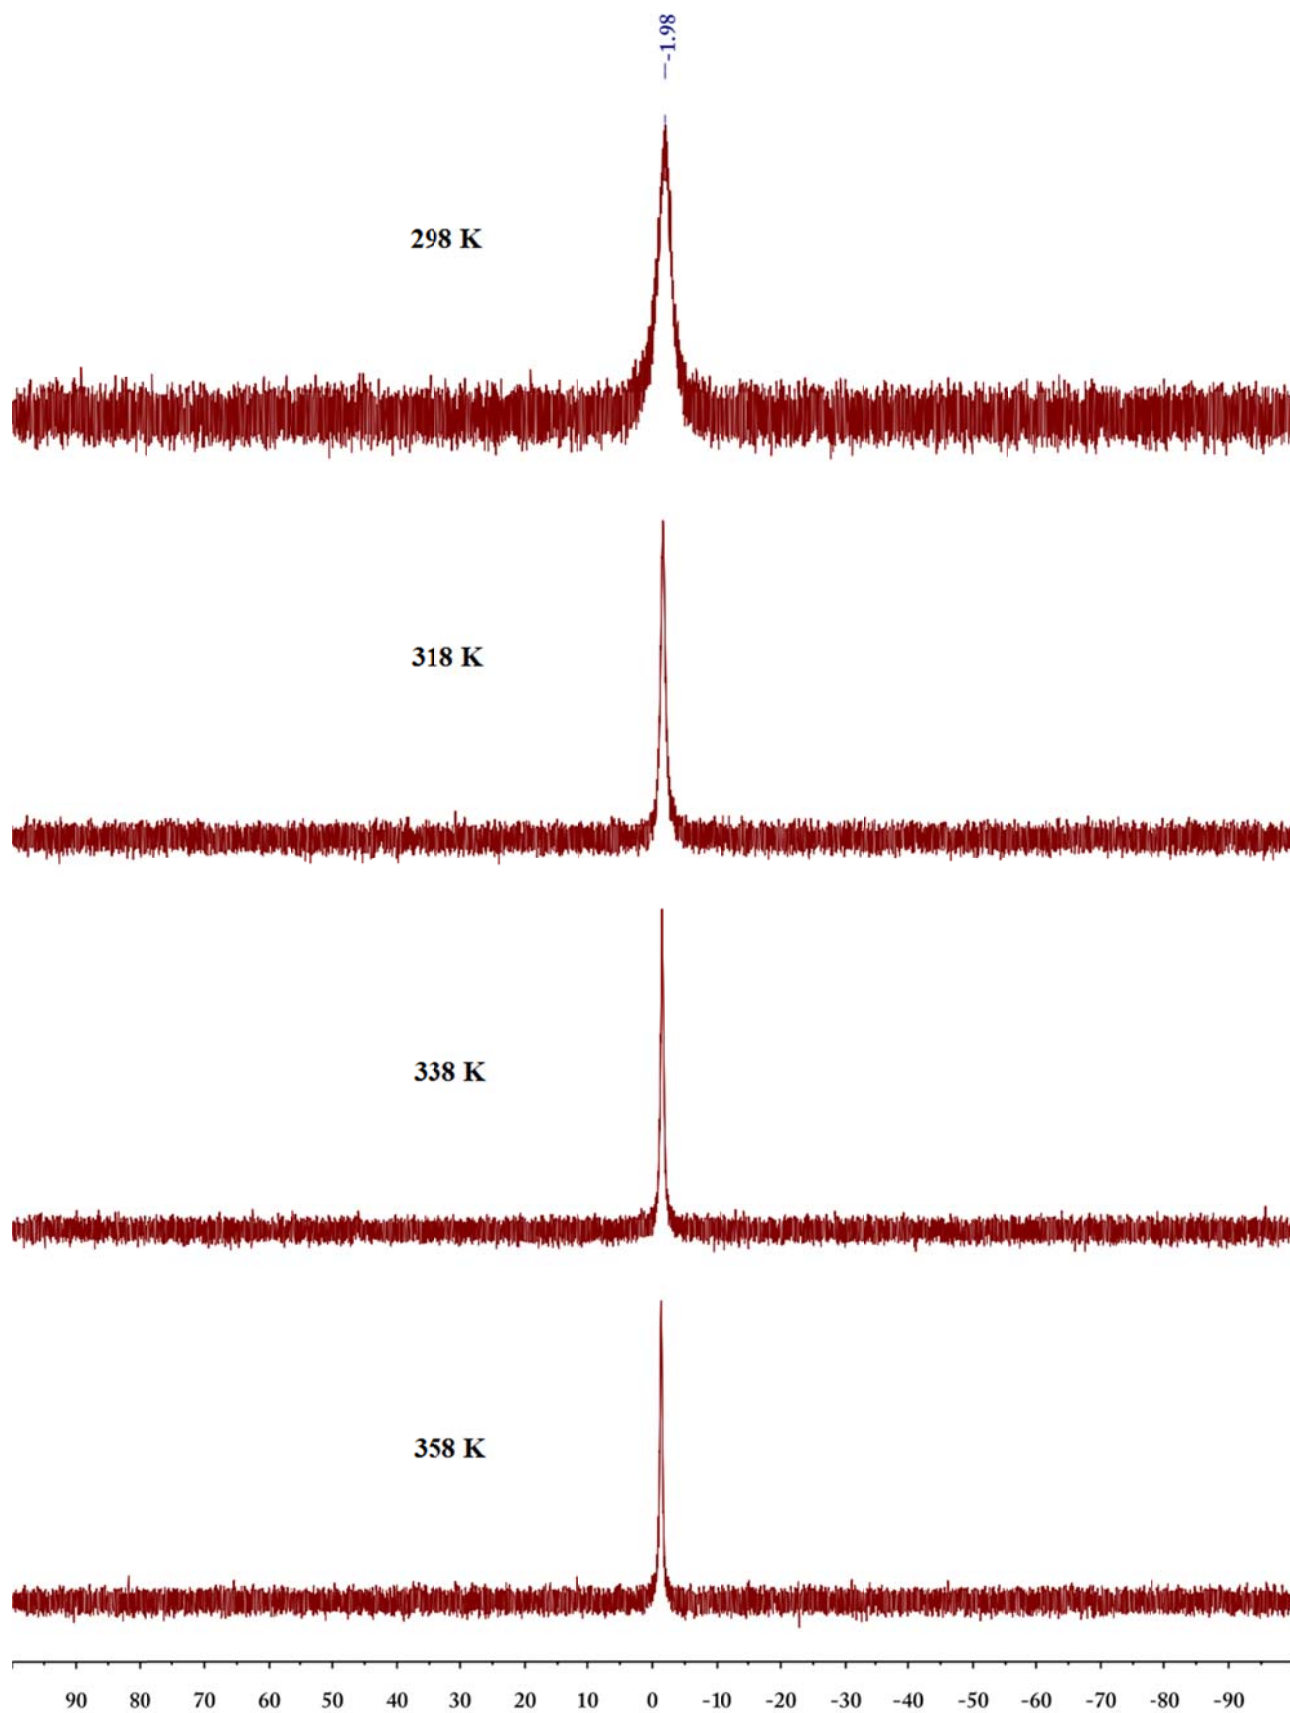

**Fig. S12** Variable-temperature  $^{31}\text{P}$  NMR spectra of **2** in  $\text{DMSO-}d_6$  from 298 K to 358 K.



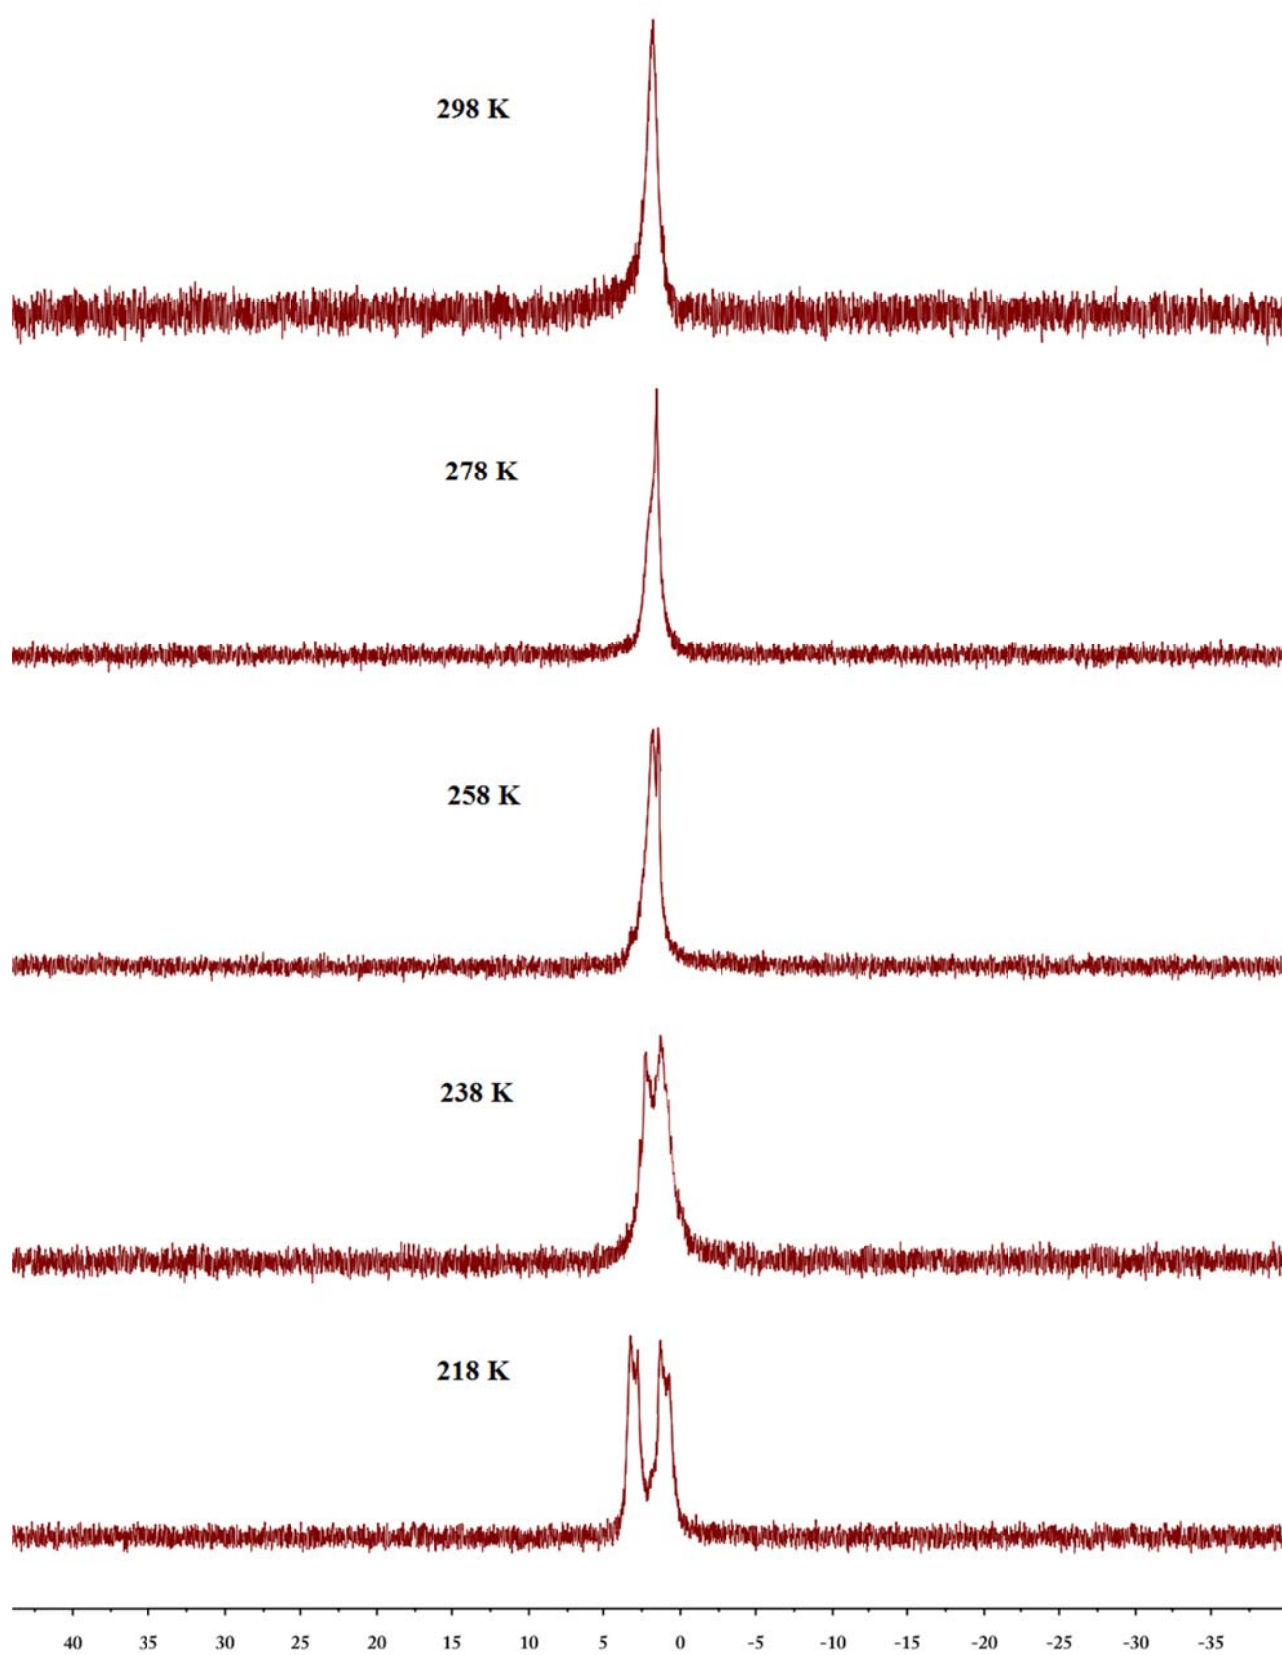

**Fig. S13** Variable-temperature  $^{31}\text{P}$  NMR spectra of **4** in  $\text{CD}_2\text{Cl}_2$  from 298 K to 218 K.

CJL-F1 #67 RT: 1.50 AV: 1 NL: 2.15E7  
T: + c ESI Full ms [ 50.00-1000.00]

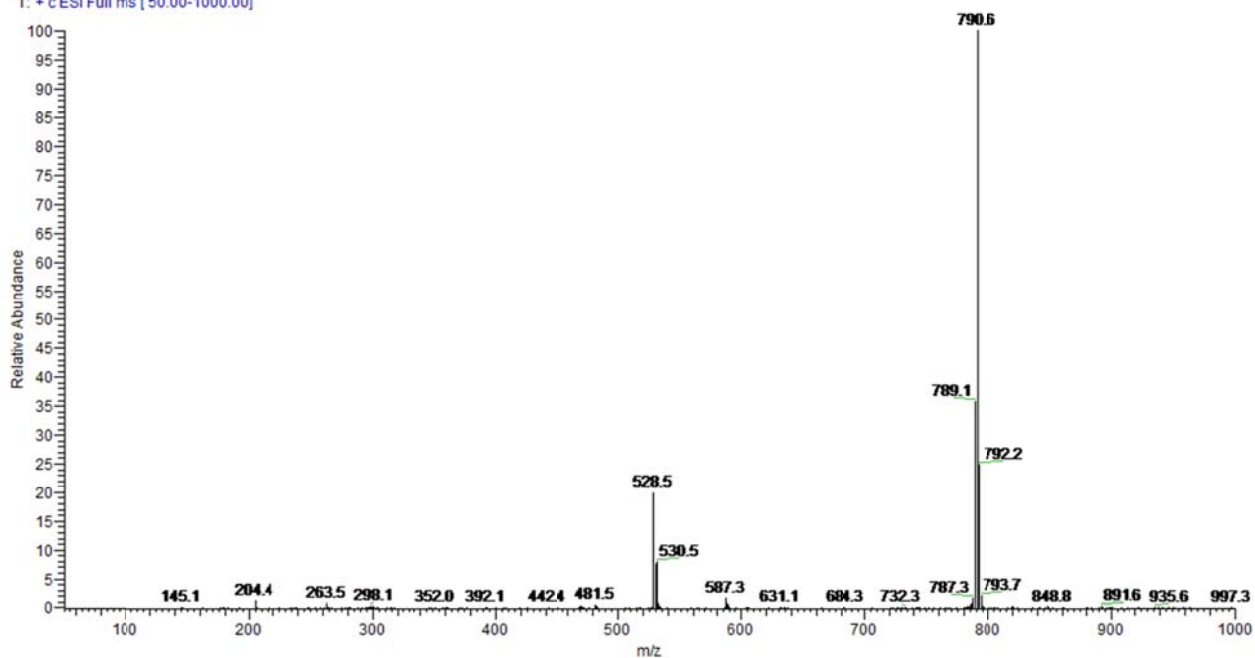

Fig. S14 ESI-MS of complex 1.

CJL-F2 #25 RT: 0.88 AV: 1 NL: 1.56E7  
T: + c ESI Full ms [ 200.00-2000.00]

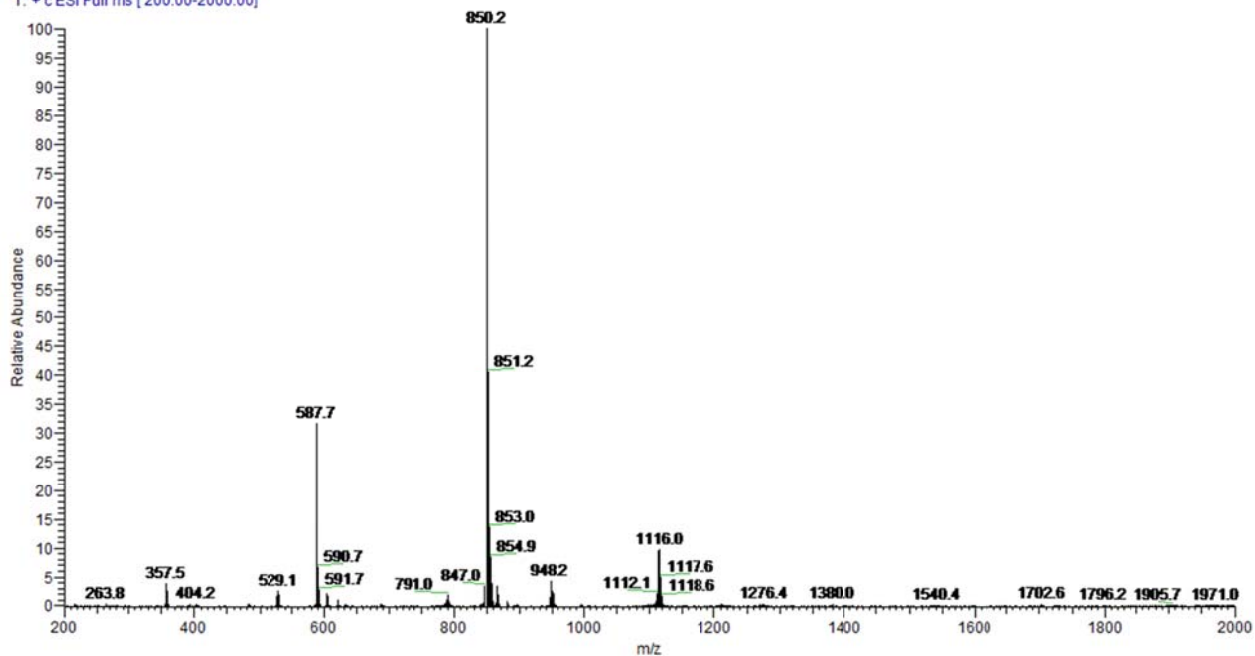

Fig. S15 ESI-MS of complex 2.

CJL-F3 #40 RT: 1.54 AV: 1 NL: 4.68E6  
T: + c ESI Full ms [200.00-2000.00]

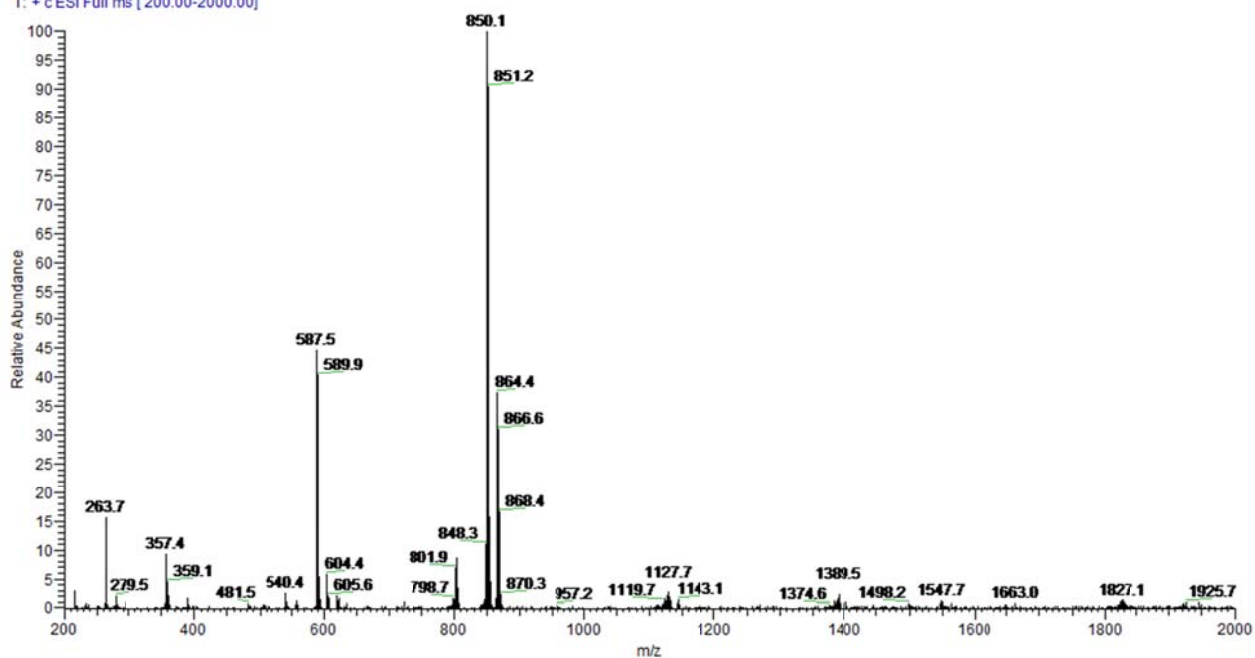

Fig. S16 ESI-MS of complex 3

CJL-F4 #33 RT: 1.24 AV: 1 NL: 1.69E7  
T: + c ESI Full ms [200.00-2000.00]

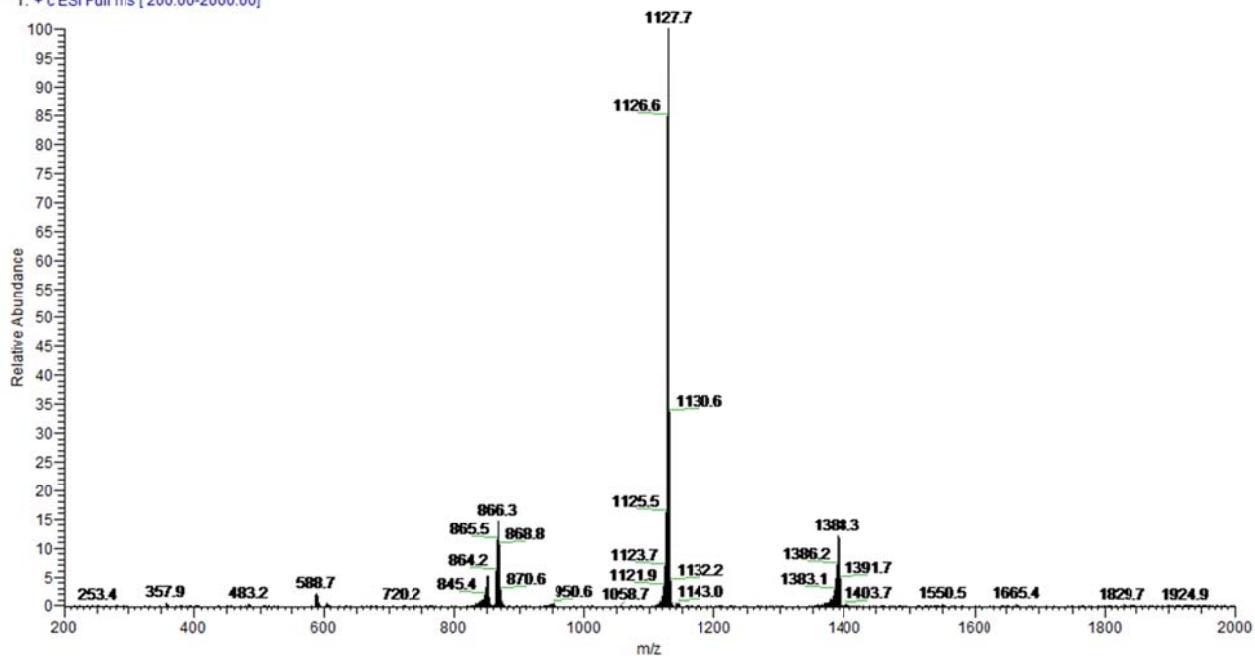

Fig. S17 ESI-MS of complex 4

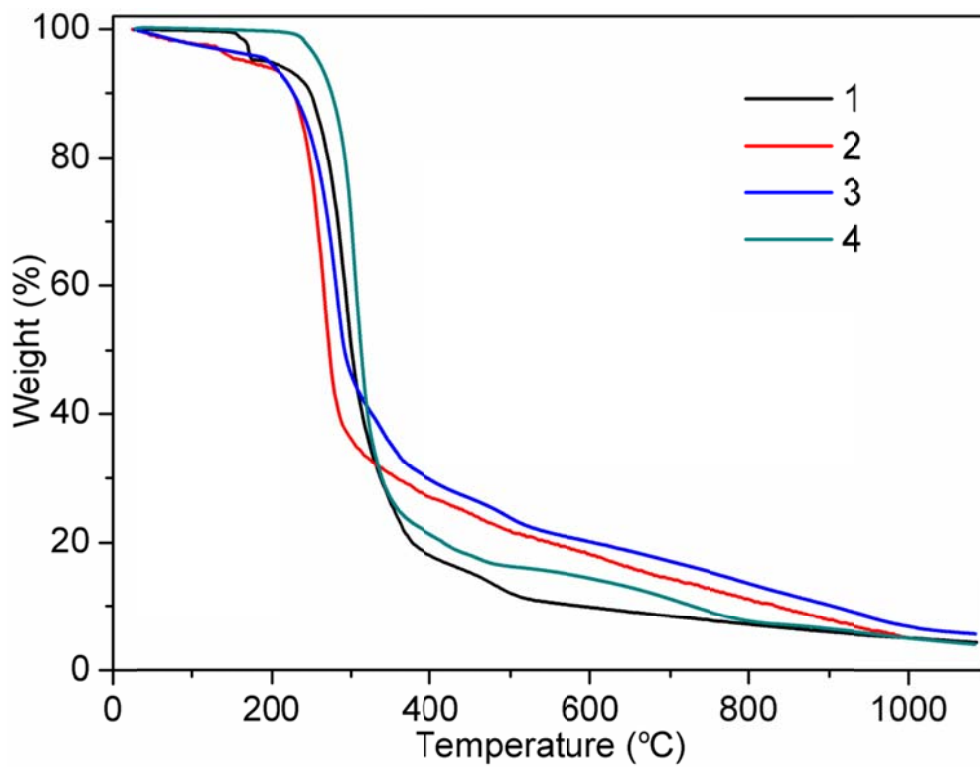

**Fig. S18** TGA curves of complexes 1–4 in N<sub>2</sub>.

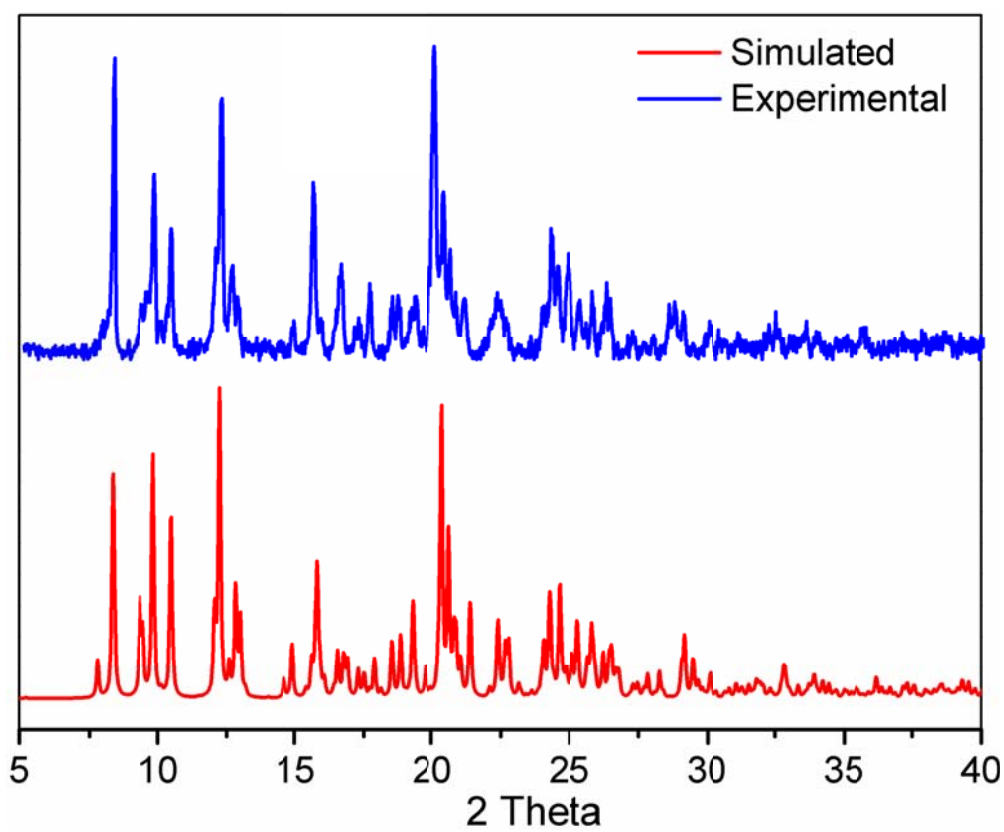

**Fig. S19** The PXRD pattern of complex 1.

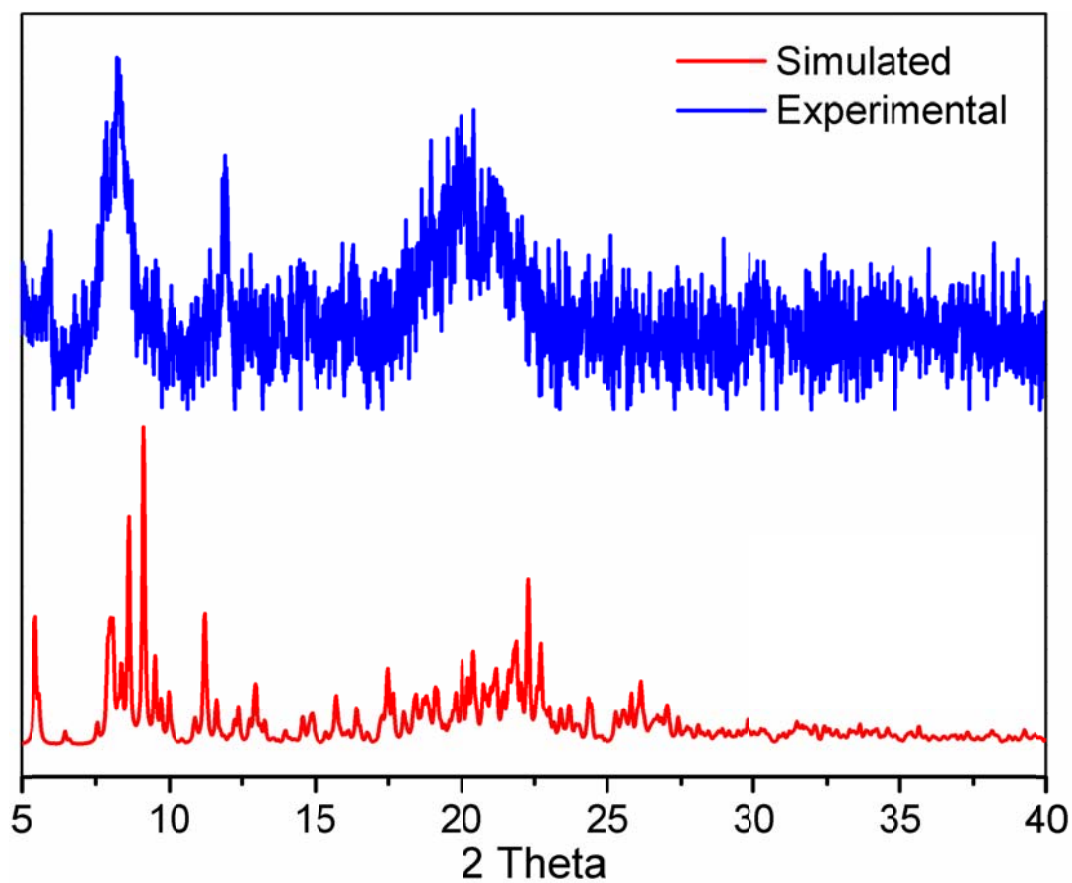

**Fig. S20** The PXRD pattern of complex 2.

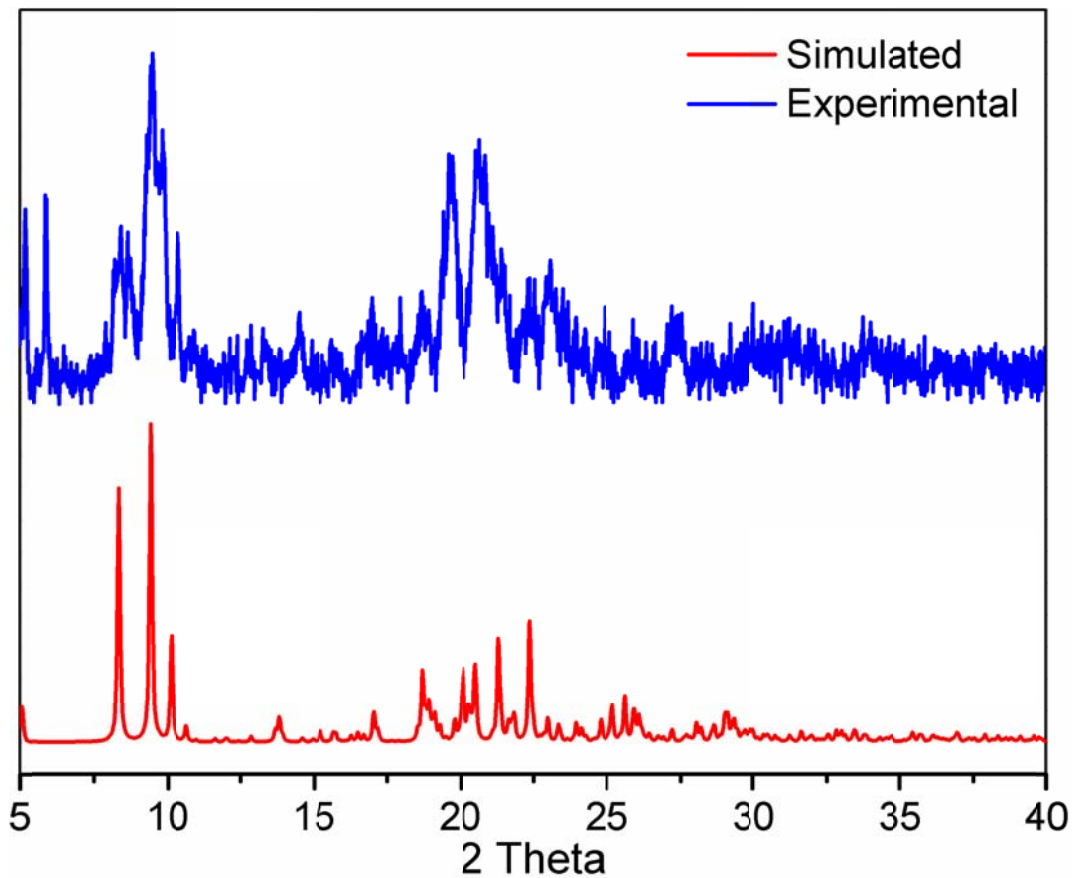

**Fig. S21** The PXRD pattern of complex 3.

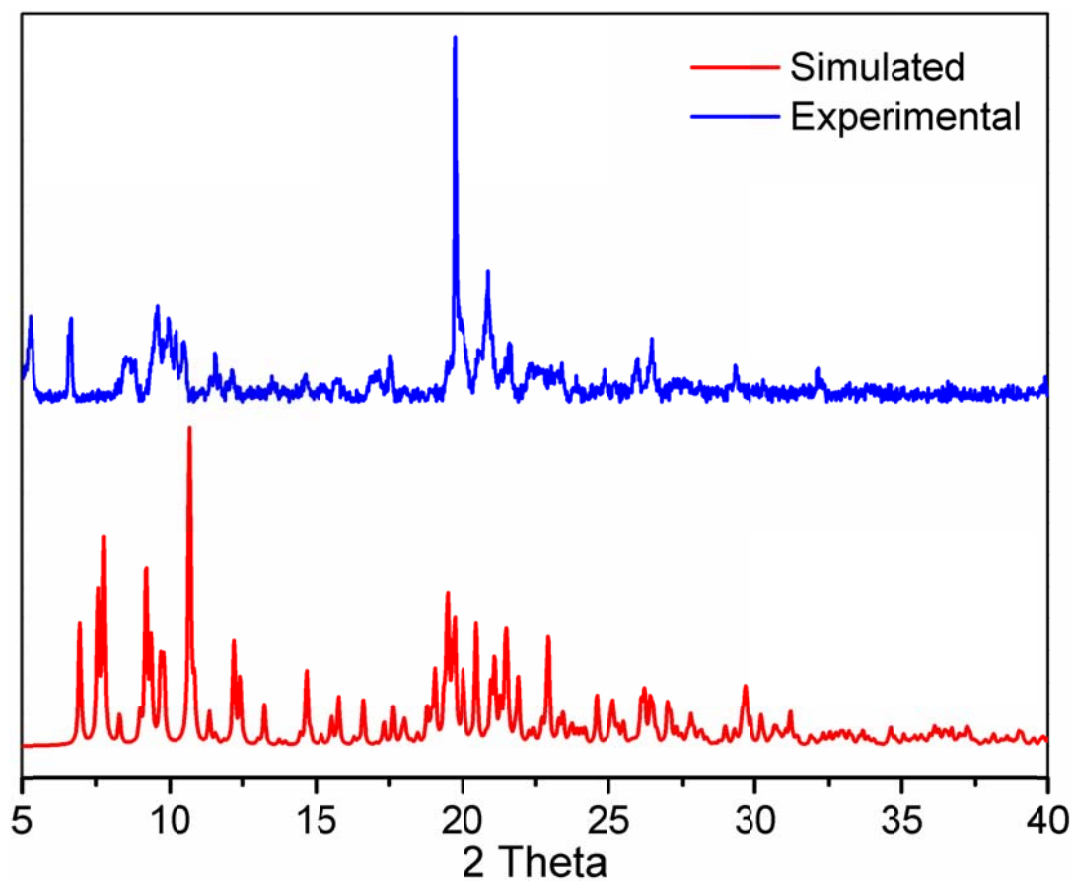

**Fig. S22** The PXRd pattern of complex 4.

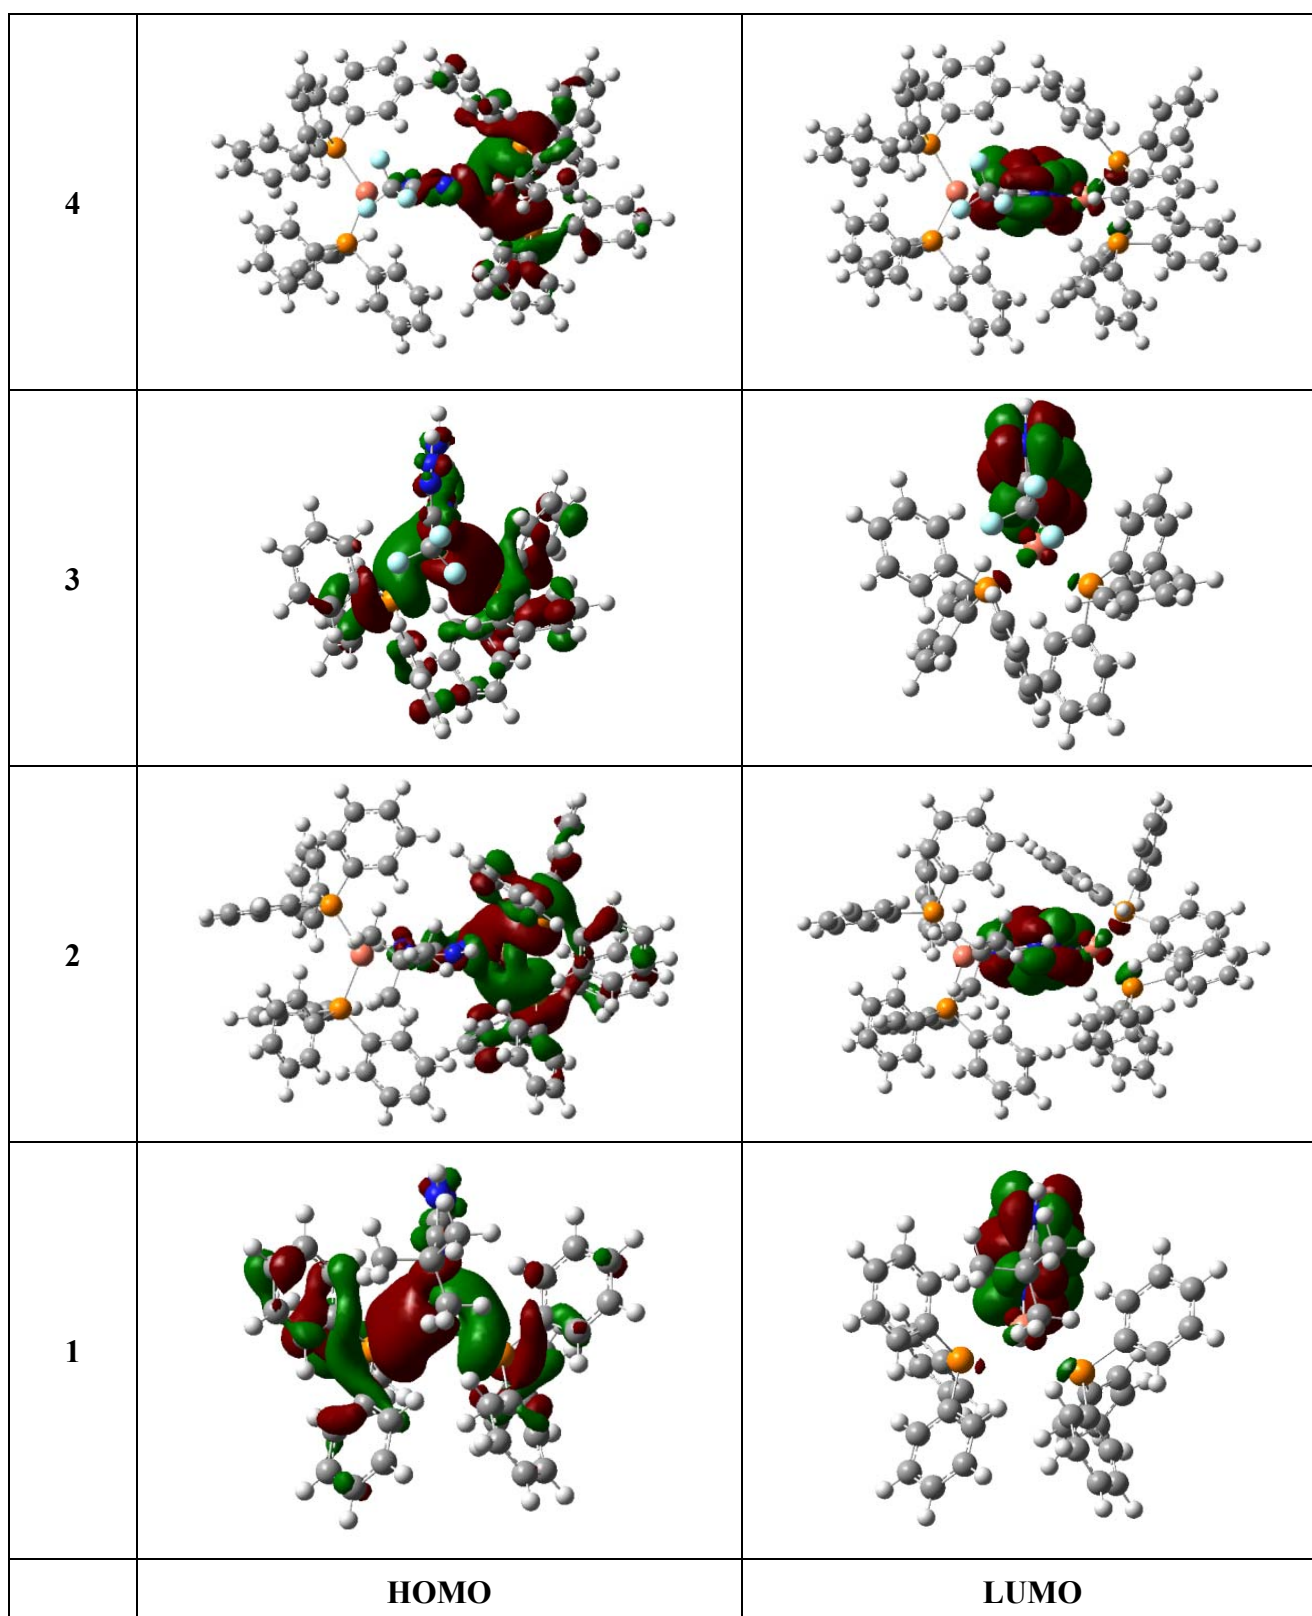

**Fig. S23** Plots of the frontier molecular orbitals involved in the lowest triplet excited state of complexes **1–4** based on the  $T_1$ -optimized structure in  $\text{CH}_2\text{Cl}_2$  media calculated by TD-DFT method at the PBE1PBE level ( $\text{iso}_{\text{value}} = 0.02$ ).

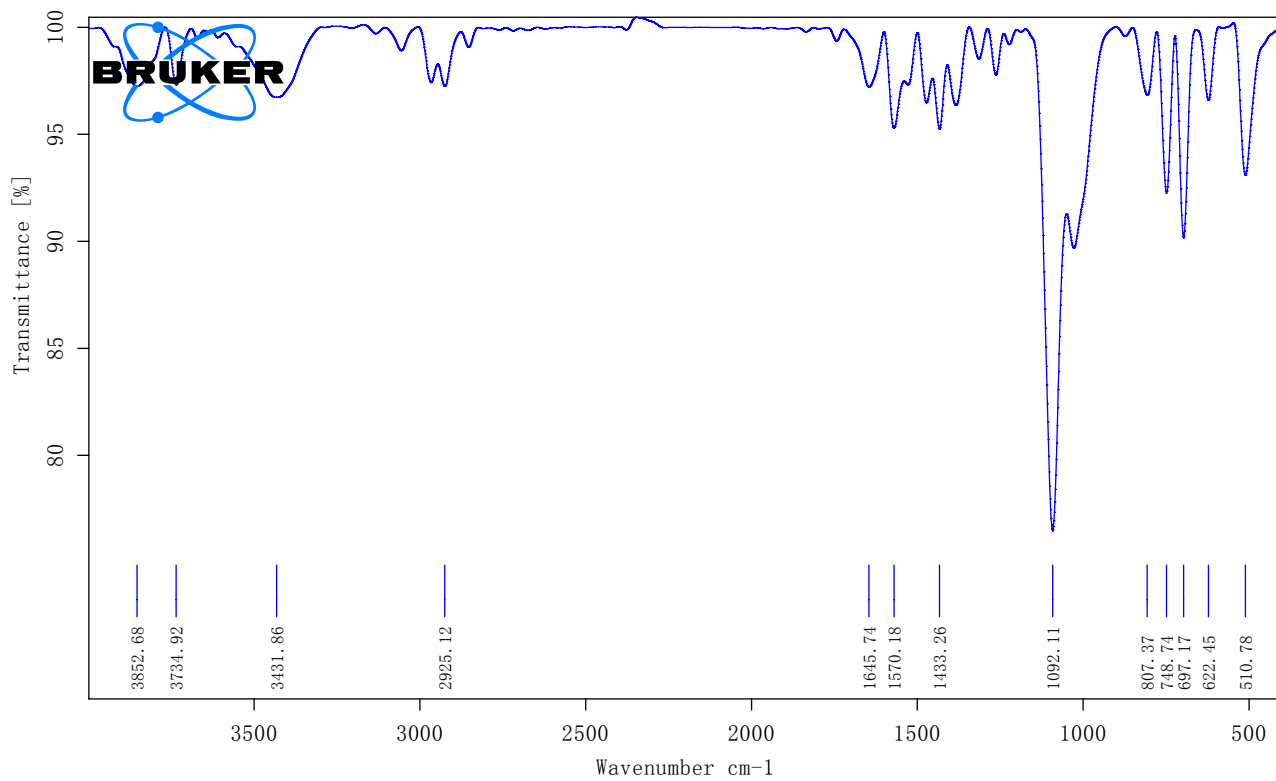

**Fig. S24** IR spectrum of complex 1.

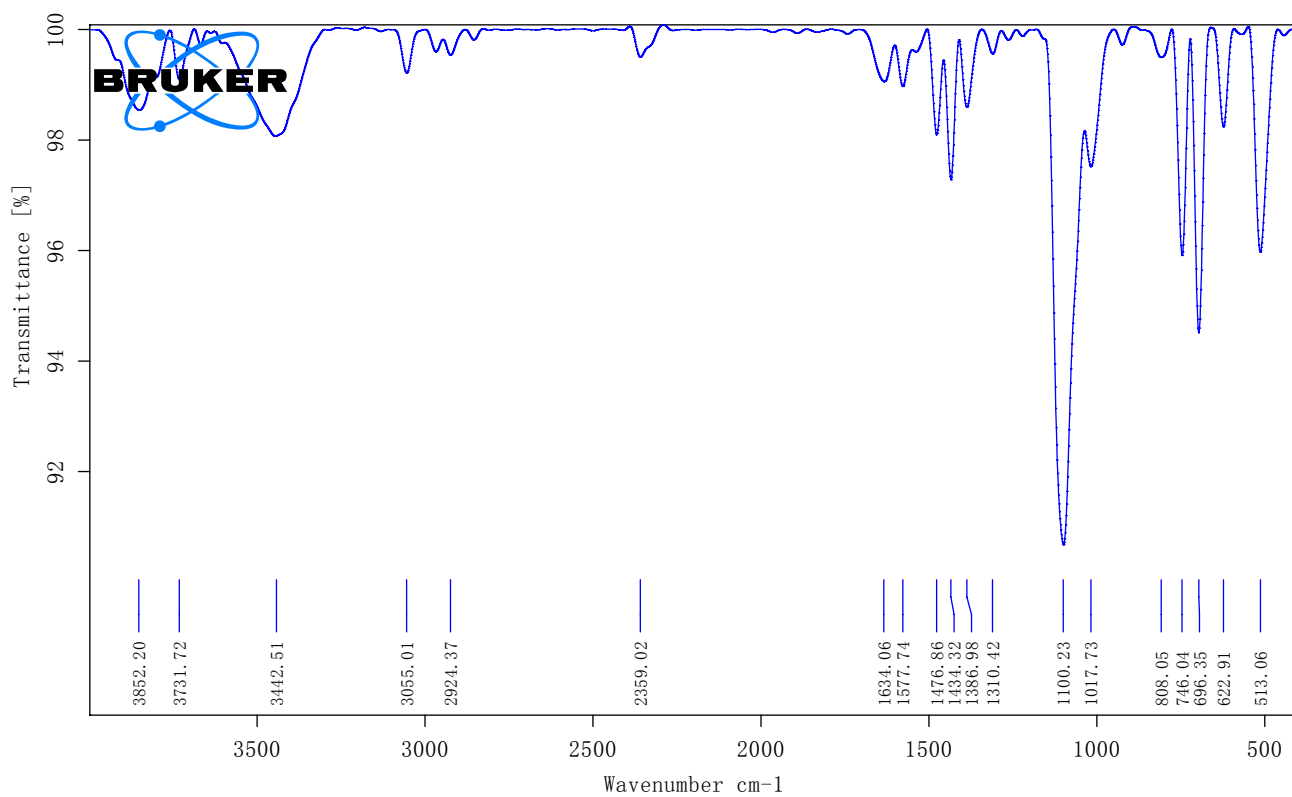

**Fig. S25** IR spectrum of complex 2.



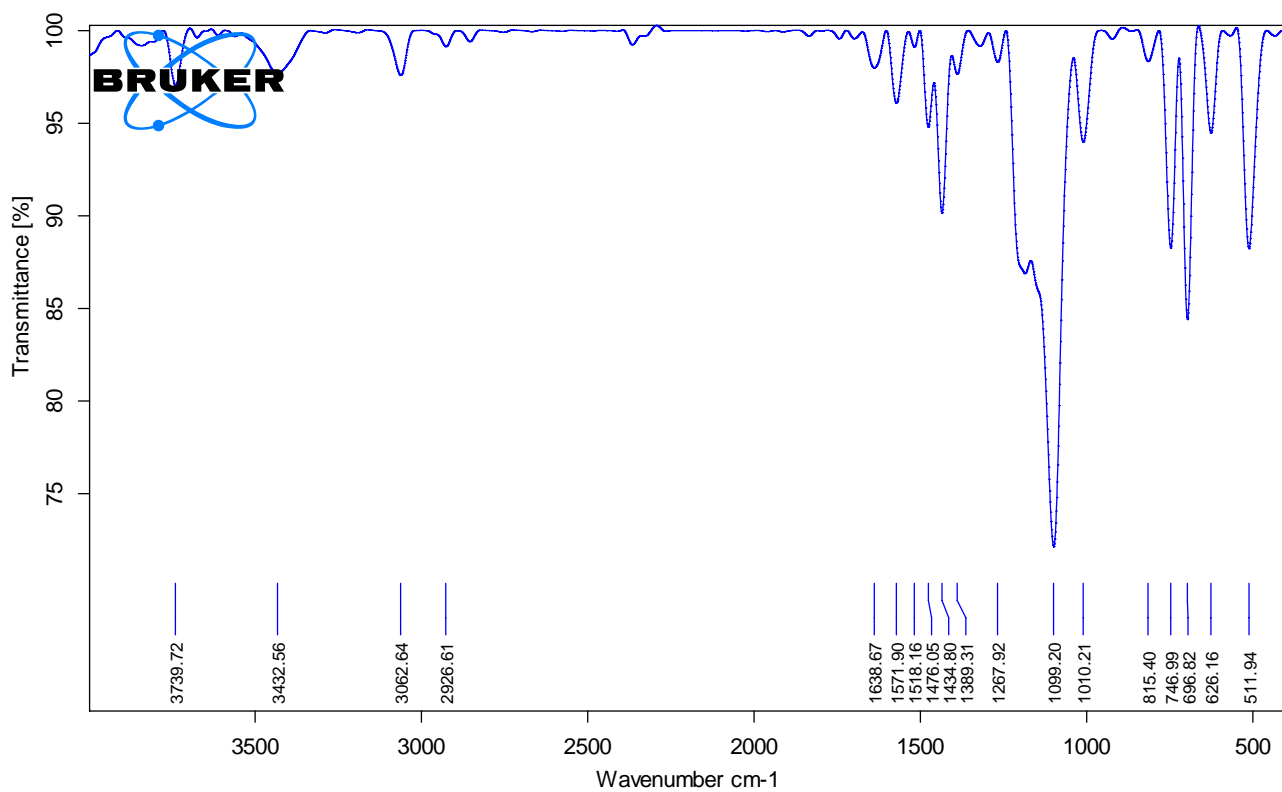

**Fig. S26** IR spectrum of complex 3.

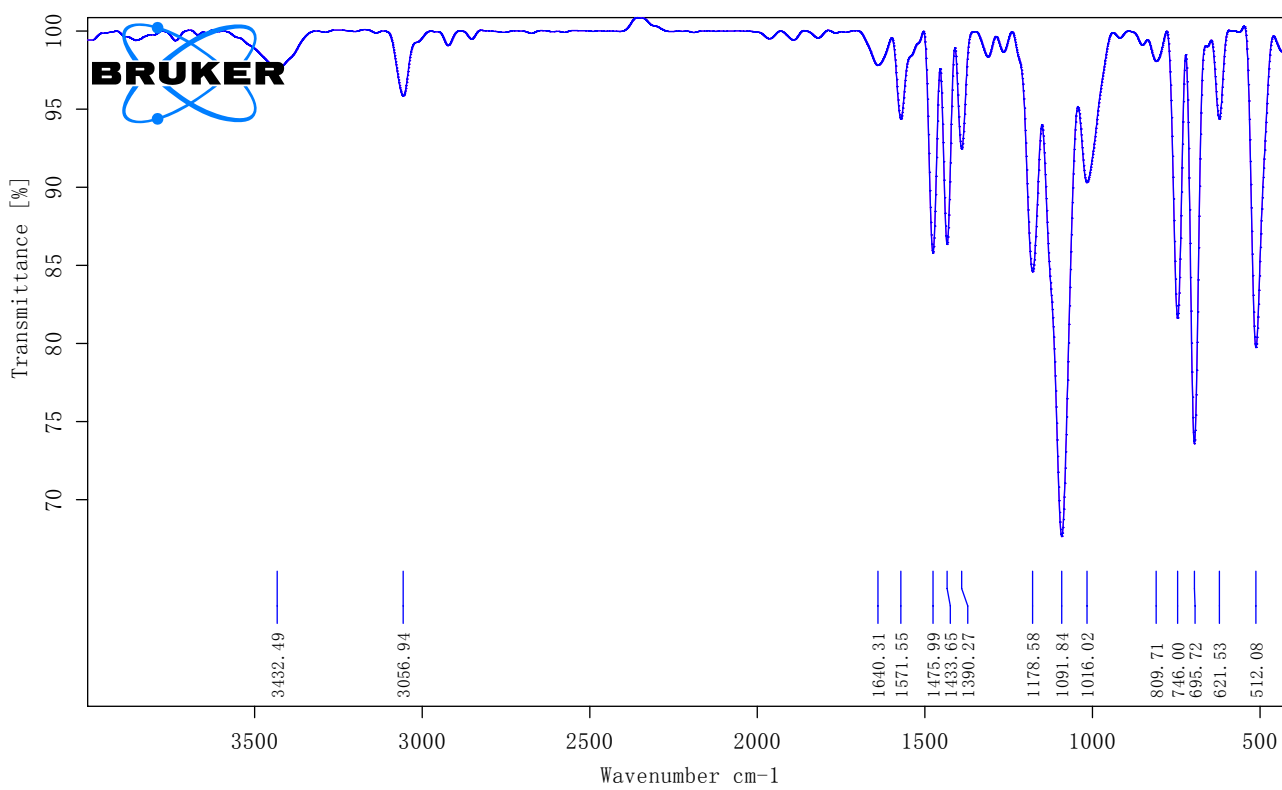

**Fig. S27** IR spectrum of complex 4.

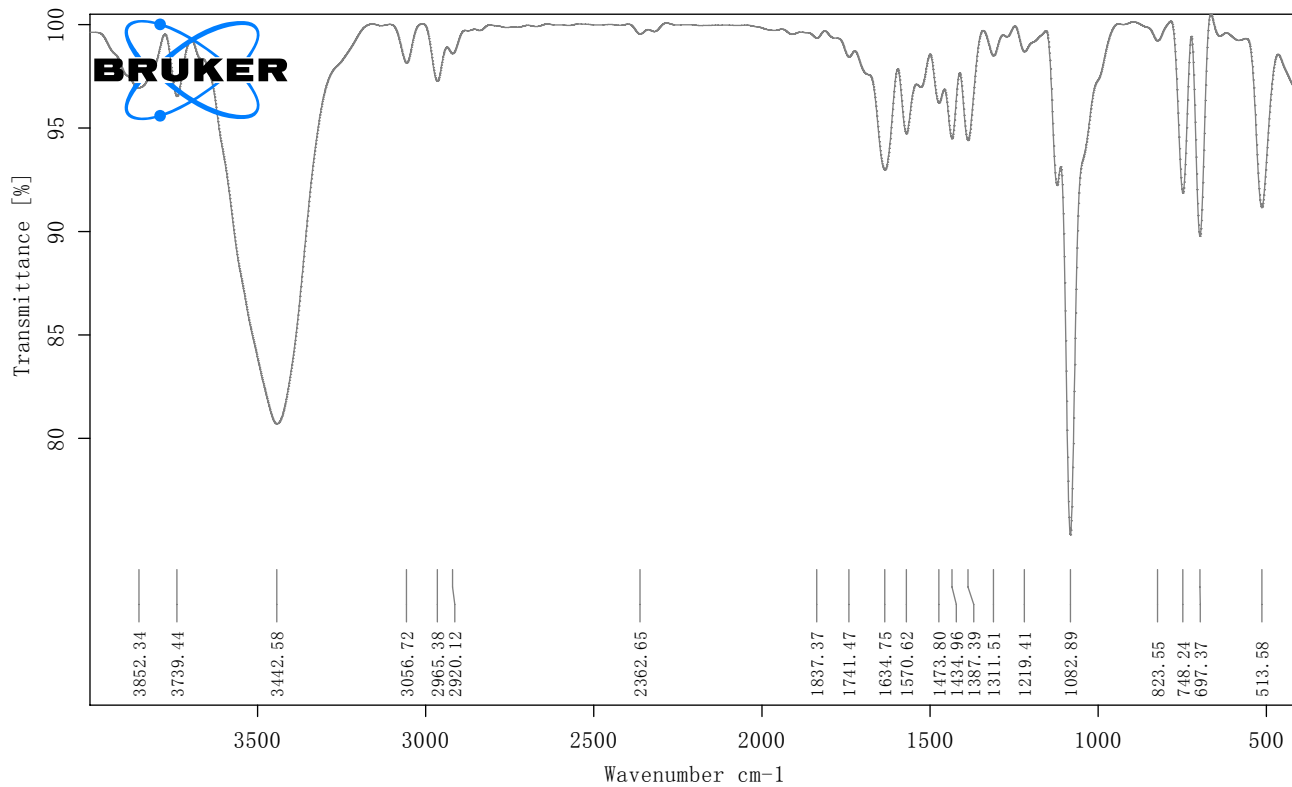

**Fig. S28** IR spectrum of complex 1a.

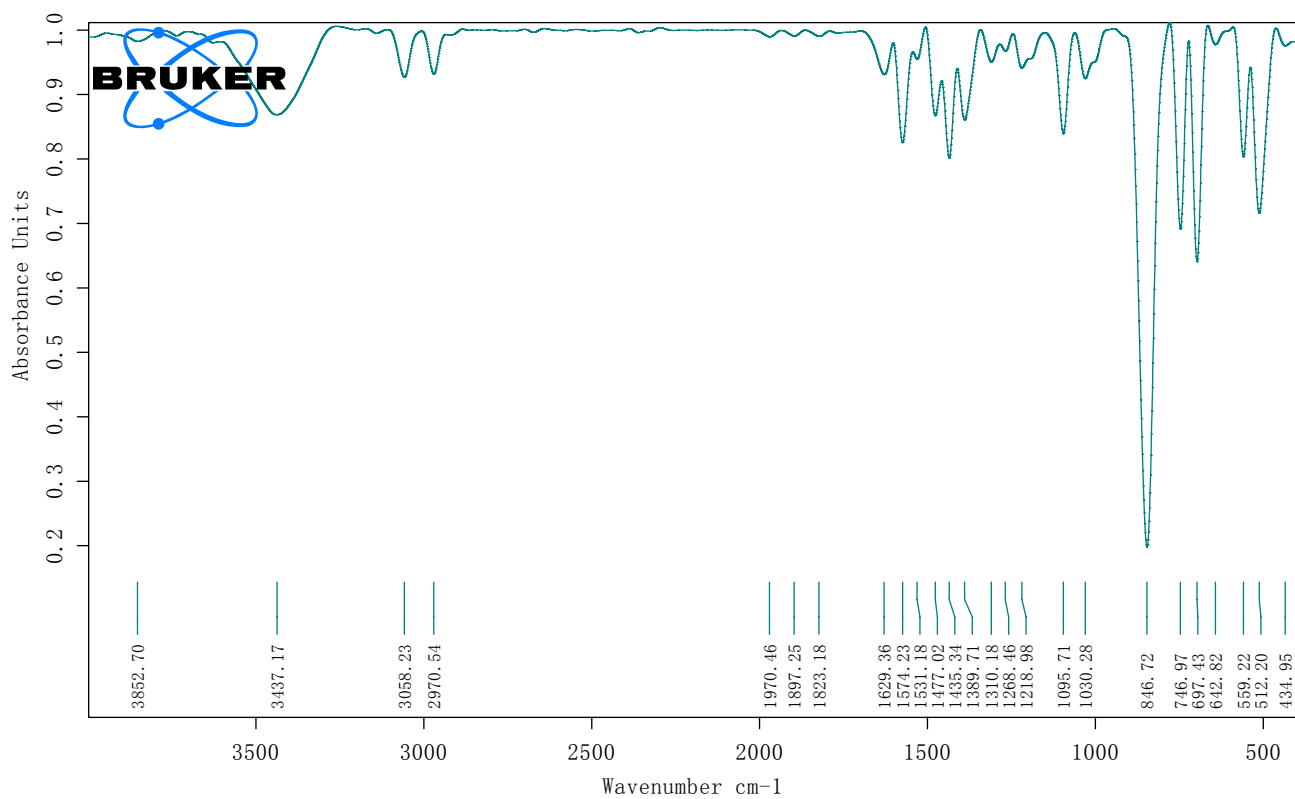

**Fig. S29** IR spectrum of complex 1b.

**Table S1** Partial molecular orbital compositions (%) by SCPA approach (C-squared population analysis proposed by Ros and Schuit) for **1–4** based on the S<sub>0</sub>-optimized structures in CH<sub>2</sub>Cl<sub>2</sub> media calculated by TD-DFT method at the PBE1PBE level

|          | Orbital | Energy (eV) | HOMO-LUMO Gap (eV) | MO Contribution (%) |       |       |                  |
|----------|---------|-------------|--------------------|---------------------|-------|-------|------------------|
|          |         |             |                    | Cu                  | P     | Ph    | bpmtzH or fpmtzH |
| <b>1</b> | HOMO    | -6.50       | 4.44               | 35.12               | 19.68 | 41.27 | 3.93             |
|          | LUMO    | -2.06       |                    | 0.76                | 0.00  | 1.51  | 97.73            |
| <b>2</b> | HOMO    | -6.75       | 3.90               | 31.97               | 18.21 | 45.89 | 3.93             |
|          | LUMO    | -2.85       |                    | 1.51                | 0.62  | 1.66  | 96.21            |
| <b>3</b> | HOMO    | -6.56       | 3.89               | 32.35               | 18.69 | 46.16 | 2.80             |
|          | LUMO    | -2.67       |                    | 0.96                | 0.23  | 0.87  | 97.94            |
| <b>4</b> | HOMO    | -6.30       | 4.27               | 36.80               | 20.22 | 36.67 | 6.31             |
|          | LUMO    | -2.03       |                    | 1.40                | 0.39  | 3.17  | 95.04            |

**Table S2** Partial molecular orbital compositions (%) by SCPA approach (C-squared population analysis proposed by Ros and Schuit) for **1–4** based on the T<sub>1</sub>-optimized structures in CH<sub>2</sub>Cl<sub>2</sub> media calculated by TD-DFT method at the PBE1PBE level

|          | Orbital | Energy (eV) | HOMO-LUMO Gap (eV) | MO Contribution (%) |       |       |                  |
|----------|---------|-------------|--------------------|---------------------|-------|-------|------------------|
|          |         |             |                    | Cu                  | P     | Ph    | bpmtzH or fpmtzH |
| <b>1</b> | HOMO    | -5.85       | 3.25               | 37.67               | 20.09 | 31.11 | 11.13            |
|          | LUMO    | -2.60       |                    | 2.20                | 0.32  | 1.64  | 95.84            |
| <b>2</b> | HOMO    | -5.98       | 2.62               | 35.64               | 22.45 | 29.6  | 12.31            |
|          | LUMO    | -3.36       |                    | 0.04                | 1.97  | 5.8   | 92.19            |
| <b>3</b> | HOMO    | -5.82       | 2.67               | 34.37               | 24.13 | 30.25 | 11.25            |
|          | LUMO    | -3.15       |                    | 2.39                | 1.33  | 1.39  | 94.89            |
| <b>4</b> | HOMO    | -5.54       | 3.01               | 41.01               | 21.37 | 22.51 | 15.11            |
|          | LUMO    | -2.53       |                    | 0.11                | 1.76  | 5.37  | 92.76            |
